33 <sup>#b</sup>Current address: Cornell Wildlife Health Center, College of Veterinary Medicine, Cornell  
34 University, Ithaca, New York, United States of America

35  
36 <sup>#c</sup>Current address: Australian Wildlife Health Centre, Healesville Sanctuary, Zoos Victoria,  
37 Healesville, Victoria, Australia

38  
39 <sup>#d</sup>Current address: British Columbia Ministry of Environment and Climate Change Strategy,  
40 Victoria, British Columbia, Canada

41

42

43 \* Corresponding author

44

45 E-mail: [afine@wcs.org](mailto:afine@wcs.org) (AEF)

46

47 <sup>¶</sup> These authors contributed equally to this work.

48

49 <sup>&</sup> These authors also contributed equally to this work.

50

## 51 **Abstract**

52           Outbreaks of emerging coronaviruses in the past two decades and the current pandemic  
53 of a novel coronavirus (SARS-CoV-2) that emerged in China highlight the importance of this  
54 viral family as a zoonotic public health threat. To gain a better understanding of coronavirus  
55 presence and diversity in wildlife at wildlife-human interfaces in three southern provinces in Viet  
56 Nam 2013-2014, we used consensus Polymerase Chain Reactions to detect coronavirus  
57 sequences. In comparison to previous studies, we observed high proportions of positive samples  
58 among field rats (34.0%, 239/702) destined for human consumption and insectivorous bats in  
59 guano farms (74.8%, 234/313) adjacent to human dwellings. Most notably among field rats, the  
60 odds of coronavirus RNA detection significantly increased along the supply chain from field rats  
61 sold by traders (reference group; 20.7% positivity, 39/188) by a factor of 2.2 for field rats sold in  
62 large markets (32.0%, 116/363) and 10.0 for field rats sold and served in restaurants (55.6%,  
63 84/151). Coronaviruses were detected in the majority of wildlife farms (60.7%, 17/28) and in the  
64 Malayan porcupines (6.0%, 20/331) and bamboo rats (6.3%, 6/96) that are farmed. We identified  
65 six known coronaviruses in bats and rodents, clustered in three *Coronaviridae* genera, including  
66 the *Alpha-*, *Beta-*, and *Gammacoronaviruses*. Our analysis also suggested either mixing of  
67 animal excreta in the environment or interspecies transmission of coronaviruses, as both bat and  
68 avian coronaviruses were detected in rodent feces in the trade. The mixing of multiple  
69 coronaviruses, and their apparent amplification along the wildlife supply chain into restaurants,  
70 suggests maximal risk for end consumers and likely underpins the mechanisms of zoonotic  
71 spillover to people.

72

73 **Key words:** coronavirus, One Health, rodents, bats, wildlife trade, wildlife farm, Viet Nam,  
74 surveillance, guano farming, amplification

75

## 76 **Introduction**

77 Human-wildlife contact with a bat or an intermediate host species in China likely  
78 triggered a coronavirus spillover event that may have involved wildlife markets and led to the  
79 pandemic spread of SARS-CoV-2 [1,2]. The pandemic risk of commercial trade in live wildlife  
80 was first recognized during the 2002-2003 Severe Acute Respiratory Syndrome (SARS)  
81 outbreak due to SARS-CoV [3]. This virus spread to more than 29 countries in Asia, Europe, and  
82 the Americas with 8,096 people infected and 774 deaths, costing the global economy about \$US  
83 40 billion in response and control measures [4,5]. Unfortunately, the global impact of COVID-  
84 19, the disease caused by SARS-CoV-2 has reached nearly every country and greatly surpassed  
85 those numbers by many orders of magnitude [6]. While bats are thought to be the ancestral hosts  
86 for all groups of coronaviruses, including those that were previously thought to be in the rodent  
87 and avian clades [7], for both SARS-CoV and SARS-CoV-2 wildlife trade supply chains are  
88 suspected to have contributed the additional conditions necessary for the emergence, spillover,  
89 and amplification of these viruses in humans [8,9]. To better understand the presence and  
90 diversity of coronaviruses in wildlife we conducted coronavirus surveillance at high-risk  
91 interfaces in Viet Nam from 2009 to 2014 [10]. We sampled in live field rat trade (*Rattus* sp. and  
92 *Bandicota* sp.) and wildlife farm interfaces to assess risk from different wildlife supply chains  
93 destined for human consumption, and sampled bat guano farms to assess the potential

94 occupational risk of this practice given that bat guano farm artificial roost structures are often  
95 erected near human dwellings.

96 In the early 2000s, the Vietnamese field rat trade was estimated to process 3,300-3,600  
97 tons of live rats annually for consumption, a market valued at US\$2 million [11]. Although rats  
98 are still commonly traded in wet markets and sold live for food consumption along the Mekong  
99 Delta in southern Viet Nam, no recent published data on the scale and scope of the trade is  
100 available [12]. This human-wildlife interface involves the capture of wild caught field rats,  
101 subsequent trade, and consumption along a supply chain involving the entire Mekong Delta  
102 region, particularly Cambodia and Viet Nam [13]. Driving this trade are consumers in Viet Nam  
103 and Cambodia, who report eating rats at least once per week because of their good flavor, low  
104 cost, and perception of rats as ‘healthy, nutritious, natural, or disease free’ [13]. Rodent parts  
105 (heads, tails, and internal organs discarded at slaughter) are also often fed to domestic livestock  
106 or herptiles raised in captivity including frogs, snakes, and crocodiles [12]. Records of this local  
107 trade in field rats include official rat hunts, instituted by French administrators, that killed  
108 upwards of 10,000 rats a day prior to the arrival of bubonic plague in Ha Noi in 1903 [14].

109 Over the past three decades, commercial wildlife farming has developed in many  
110 countries in Southeast Asia, including Viet Nam. Although there are historic references to the  
111 occurrence of wildlife farms in Viet Nam dating back to the late 1800s, the rapid expansion in  
112 terms of farm numbers, species diversity, and scale of operations has occurred in recent decades  
113 in response to growing domestic and international demand for wildlife [15]. A 2014 survey  
114 across 12 provinces in southern Viet Nam identified 6,006 registered wildlife farms of which  
115 4,099 had active operations. The surveyed farms were stocked with approximately one million  
116 wild animals including, rodents, primates, civets, wild boar, Oriental rat-snakes, deer, crocodiles,

117 and softshell turtles. Ninety-five percent of the farms held 1-2 species of wildlife, and 70% of the  
118 farms also raised domestic animals on the same premises [16]. A key component of the wildlife  
119 farm industry in Viet Nam is the raising of wild species for meat for human consumption [16].  
120 These farms sell to urban wild meat restaurants serving increasingly affluent populations  
121 throughout the country and also supply international markets with wild meat [17]. Commercial  
122 wildlife farming in Viet Nam is part of the expanded international trade of wildlife that has been  
123 hypothesized to contribute to the cause of global epidemics, such as SARS [18] and now  
124 COVID-19.

125       Emerging evidence suggests zoonotic virus spillover risk is a concern at bat-human  
126 interfaces in Asia. Guano harvested from a cave in Thailand were positive for a group C  
127 betacoronavirus, which includes MERS-CoV, and 2.7% of 218 people living in close proximity  
128 to bats known to carry viruses related to SARS-CoV tested positive for SARS-related antibodies  
129 in China [19,20]. The traditional practice of guano farming in parts of Cambodia and Viet Nam  
130 involves the construction of artificial bat roosts in gardens or backyard farms, under which  
131 domestic animals and crops are raised, and children often play [21,22]. Cambodian development  
132 programs promoted the practice in 2004 to enhance soil fertility, reduce reliance on chemical  
133 fertilizers, generate income (\$US 0.50/kg), control insect pests, and protect the lesser Asiatic  
134 yellow bats (*Scotophilus kuhlii*) that were being hunted [21–23]. No personal protection  
135 measures are taken when harvesting the guano, which is used as fertilizer and is reported to  
136 improve the growth rate in five economically important plant species [24].

137       In this study we investigated the presence and diversity of coronavirus sequences in the  
138 field rat trade distribution chain, wildlife farms specializing in rodents for human consumption,

139 and bat guano “farms” and roosts near human dwellings to better understand the natural hosts of  
140 coronaviruses and the risk for these interfaces to facilitate spillover into humans.

141

## 142 **Materials and Methods**

### 143 **Sampling Locations**

144         Sampling was performed at multiple sites representing several high-risk interfaces for  
145 contacts among people, rodents, and bats. Rodent sampling focused on the live rodent trade  
146 supply chain and rodent farms. Along the supply chain, we targeted eight sites involved in the  
147 private sale and processing of live rodents for consumption, defined as ‘traders’ for the purpose  
148 of this study in Dong Thap and Soc Trang provinces, 14 large markets sites in Dong Thap and  
149 Soc Trang provinces (>20 vendors), and two restaurant sites in Soc Trang province (Fig 1). The  
150 28 rodent farm sites we targeted in Dong Nai province produced Malayan porcupines (*Hystrix*  
151 *brachyura*) and bamboo rats (*Rhizomys* sp.) for human consumption (Fig 2). Other species  
152 observed or raised at the wildlife farm sites included dogs, cattle, pigs, chickens, ducks, pigeons,  
153 geese, common pheasant, monitor lizards, wild boar, fish, python, crocodiles, deer, civets, non-  
154 human primates as pets or part of private collections, free-flying wild birds, and free-ranging  
155 peri-domestic rodents.

156

157 **Fig 1. Slaughtering rodents (left) and rodent market (right) in Dong Thap province,**  
158 **October 2013.**

159

160 **Fig 2. Malayan porcupines (*Hystrix brachyura*) farm in Dong Nai province, November**  
161 **2013.**

162

163 Bat sampling occurred at bat guano “farms” and a natural bat roost located at a religious  
164 site. Bat guano farms consisted of artificial roosts constructed with a concrete base and pillars  
165 topped with fronds of coconut palm or Asian Palmyra Palm (*Borassus flabellifer*) (Fig 3).  
166 Seventeen bat guano farms were sampled in the two provinces of Dong Thap and Soc Trang. The  
167 natural bat roost was located at a religious site in Soc Trang province known as the “bat pagoda”,  
168 where *Pteropus* sp. have historically roosted in trees protected from hunting, and light and noise  
169 pollution [25].

170

### 171 **Fig 3. Bat guano farms in Soc Trang Province, October 2013.**

172

173 All study sampling occurred from January 2013 to March 2014 at 41 sites in the wet  
174 (south Viet Nam: May 1<sup>st</sup> - November 30<sup>th</sup>) and 30 in the dry (south Viet Nam: December 1<sup>st</sup> -  
175 April 30<sup>th</sup>) seasons. Given the distances between sites, all sites were sampled once except the bat  
176 pagoda natural roost in Soc Trang province, which was visited three times and sampled in both  
177 seasons.

### 178 **Animal sampling**

179 Samples were humanely collected using standard and previously published protocols  
180 [26]. Feces, swabs of the pen floors, and urine/urogenital swabs were collected from rodents at  
181 wildlife farms. Samples were classified as ‘fecal sample’ when collected from animals housed  
182 individually, and as ‘environmental sample’ when collected below cages housing multiple  
183 individuals. Samples from rodents in the trade included primarily oral swabs in addition to  
184 tissues (i.e. brain, kidney, lung, and small intestine), rectal swabs, and urine/urogenital swabs.  
185 These samples were collected from individual carcasses after the rodents were slaughtered by a



186 market vendor, trader, or restaurant kitchen staff. However, the rodents were usually butchered at  
187 a common site for each observed time period that was only cleaned intermittently following the  
188 trader's, vendor's, or restaurant's regular practices. Oral swabs were taken from the severed  
189 heads, and additional tissue samples were collected from the internal organs and the  
190 gastrointestinal tracts which were removed during the butchering process.

191 Fecal samples and a small number of urine samples from bats in guano farms and the  
192 natural roost site were collected on clean plastic cover sheets within 1-2 hours after placement  
193 under bat roosts, and thus each sample may represent one or multiple bats. Oral and rectal swabs  
194 were also collected from live-captured bats at the natural pagoda roost site.

195 Animals were identified in the field to the lowest taxonomic level possible based on  
196 morphological characteristics, and species was identified in a subset of animals through genetic  
197 barcoding [15]. Due to difficulty of morphologic identification in the field, unless barcoded,  
198 rodents (*Rattus argentiventer*, *R. tanezumi*, *R. norvegicus*, *R. exulans*, *R. losea*, and *Bandicota*  
199 *indica*; [12,27]) were categorized as “field rats”. Bats were classified as “*Microchiroptera*”  
200 following the traditional taxonomic classification (new classification of two new suborders  
201 *Yangochiroptera* and *Yinpterochiroptera*, was only published near the end of the study, so for  
202 consistency we used the historical classification [28]).

203 All samples were collected in cryotubes containing RNAlater (RNA stabilization reagent,  
204 Qiagen), and stored in liquid nitrogen in the field before being transported to the laboratory for  
205 storage at -80 °C. Samples were tested by the Regional Animal Health Office No. 6 (RAHO6)  
206 laboratory in Ho Chi Minh City. The study was approved by the Department of Animal Health of  
207 the Ministry of Agriculture and Rural Development and protocols were reviewed by the

208 Institutional Animal Care and Use Committee at the University of California at Davis (protocol  
209 number 16048).

## 210 **Sample Testing**

211 RNA was extracted (RNA MiniPrep Kit, Sigma-Aldrich) and cDNA transcribed  
212 (SuperScript III First Strand cDNA Synthesis System, Invitrogen). Coronavirus RNA was  
213 detected using two broadly reactive consensus nested-PCR assays targeting the *RNA dependent*  
214 *RNA polymerase (RdRp)* gene [29,30]. The positive control was a synthetic plasmid containing  
215 the primer-binding sites for both assays. Distilled water was used as a negative control and  
216 included in each test batch. PCR products were visualized using 1.5% agarose gels, and bands of  
217 the correct size were excised, cloned, and sequenced by Sanger dideoxy sequencing using the  
218 same primers as for amplification.

## 219 **Phylogenetic analysis**

220 For sequence analysis and classification operating taxonomic units were defined with a  
221 cut off of 90% identity, i.e. virus sequences that shared less than 90% identity to a known  
222 sequence were labelled sequentially as PREDICT\_CoV-1, -2, -3, etc. and groups sharing  $\geq 90\%$   
223 identity to a sequence already in GenBank were given the same name as the matching sequence  
224 [7]. A phylogenetic tree was constructed for sequences amplified using the Watanabe protocol,  
225 as this PCR protocol yielded longer sequences and more positive results than the Quan protocol.  
226 Several representative sequences for each viral species found in our study were included for  
227 analysis and are available in GenBank (Table S3). Alignments were performed using MUSCLE,  
228 and trees were constructed using Maximum likelihood and the Tamura 3-parameter model in  
229 MEGA7 [31]. The best-fit model of DNA substitution was selected in MEGA7 using BIC scores  
230 (Bayesian Information Criterion) and Maximum Likelihood values ( $\ln L$ ). Bootstrap values were

231 calculated after 1000 replicates. In addition, a median-joining network was constructed using  
232 Network 5.0.0.3 [32] to explore phylogenetic relationships among bat coronavirus 512/2005  
233 sequences at the intraspecies level, as haplotype networks may better represent the relationships  
234 among viral sequences with low sequence diversity compared with phylogenetic trees [33].

## 235 **Statistical analyses**

236 Visualization of sampling locations in provinces in Viet Nam, along with the distribution  
237 by species and interface was constructed with the ggmap, ggplot2, and sp packages [34]. All  
238 analyses were done using R version 3.5.0 or higher (R Development Core Team, Vienna,  
239 Austria). Data (S1 Data) and code (S1 R Code) are available in the supplementary materials. The  
240 effect of risk factors (season, sub-interface type) was examined and limited to interfaces for  
241 which the distribution of samples across factors could support the analysis. These included  
242 season for *Pteropus* bat samples collected in the bat pagoda natural roost and the effect of season  
243 and sub-interface for samples collected in the rodent trade in southern Viet Nam. Given the low  
244 sample size, the effect of season for *Pteropus* bats samples positive for coronaviruses was  
245 assessed using a Fisher exact test. The effect of season (dry, wet, with dry season as reference  
246 category) and sub-interface type (trader, large markets, restaurants, with trader as reference  
247 category) in traded rodent samples positive for coronaviruses was assessed with a mixed effect  
248 multivariable logistic regression, with sites as random effect (i.e. grouping variable) using the  
249 lme4 R package [35]. A p-value of less than 0.05 was considered statistically significant. The  
250 95% binomial confidence intervals for proportions were calculated using binom.test in R.

251 The comparison of the proportion of coronavirus positives in different sample types was  
252 performed on positive individuals sampled in the rodent trade with multiple sample types

253 collected per individual. We then calculated the proportion of individuals positive for each  
254 sample type, as a proxy for the probability of detection by each sample type.

255

## 256 **Results**

### 257 **Detection of coronavirus by animal taxa and interface**

258 A total of 2,164 samples collected between January 2013 and March 2014 from rodents  
259 and bats were tested for coronaviruses (Table 1, S1 Table). Assuming that non-invasive samples  
260 from bats and farmed rodents represented unique distinct individuals, these samples came from  
261 1,506 individuals, including 1,131 rodents and 375 bats from 70 sites sampled in Dong Thap,  
262 Soc Trang, and Dong Nai provinces in the southern region near the Mekong River Delta (Fig 4).

263

264 **Fig 4. Map of sampling sites by province and multi-panel plots showing individual counts**  
265 **of animals sampled by province, taxa, and interface.** The color of each bar represents the  
266 animal taxonomic group sampled in Dong Nai, Dong Thap, and Soc Trang provinces. *Sciuridae*  
267 and *Rattus argentiventer* were only sampled one time apiece from wildlife farms.

268

269 Out of 70 sites, coronavirus positives were detected at 58 including 100% (24/24) of live  
270 rodent trade sites, 60.7% (17/28) of rodent wildlife farm sites, 94.1% (16/17) of bat guano farm  
271 sites, and at the one natural pteropid bat roost. Wildlife farms were only sampled in Dong Nai  
272 province and the live rodent trade and bat interfaces were sampled in Dong Thap and Soc Trang  
273 provinces (Fig 4).

274  
275  
276

**Table 1: Summary of coronavirus positives by taxa and interface. Co-infection is defined as the detection of two different coronavirus taxonomic units in an individual animal.**

| Taxa group | Interface      | Sub-interface     | Taxa group                          | % site positive      | % individual positive   | Viral species                                                                 | # of co-infected animals |
|------------|----------------|-------------------|-------------------------------------|----------------------|-------------------------|-------------------------------------------------------------------------------|--------------------------|
| Rodents    | Rodent trade   | Trader            | Field rat <sup>□</sup>              | 100% (8/8)           | 20.7% (39/188)          | Murine coronavirus (n=36), Longquan aa coronavirus (n=5)                      | 2                        |
|            |                | Large market      | Field rat <sup>□</sup>              | 100% (14/14)         | 32.0% (116/363)         | Murine coronavirus (n=103), Longquan aa coronavirus (n=31)                    | 18                       |
|            |                | Restaurant        | Field rat <sup>□</sup>              | 100% (2/2)           | 55.6% (84/151)          | Murine coronavirus (n=70), Longquan aa coronavirus (n=20)                     | 6                        |
|            | Wildlife farm  |                   | <i>Hystrix</i> sp.                  | 47.8% (11/23)        | 6.0% (20/331)           | Bat coronavirus 512/2005 (n=19), Infectious bronchitis virus (IBV) (n=1)      | 0                        |
|            |                |                   | <i>Rhizomys</i> sp.                 | 45.5% (5/11)         | 6.3% (6/96)             | Bat coronavirus 512/2005 (n=5), Infectious bronchitis virus (IBV) (n=1)       | 0                        |
|            |                |                   | <i>Rattus</i> sp. <sup>b</sup>      | 100% (1/1)           | 100% (1/1)              | Bat coronavirus 512/2005 (n=1)                                                | 0                        |
|            |                |                   | <i>Sciuridae</i> sp.                | 0% (0/1)             | 0% (0/1)                |                                                                               |                          |
| Bats       | Human dwelling | Natural bat roost |                                     |                      |                         |                                                                               |                          |
|            |                |                   | <i>Pteropus</i> sp.                 | 100% (1/1)           | 6.7% (4/60)             | PREDICT_CoV-17 (n=3), PREDICT_CoV-35 (n=1)                                    | 0                        |
|            |                |                   | <i>Cynopterus horsfieldii</i>       | 0% (0/1)             | 0% (0/2)                |                                                                               |                          |
|            |                | Bat guano farm    | <i>Microchiroptera</i> <sup>c</sup> | 94.1% (16/17)        | 74.8% (234/313)         | PREDICT_CoV-17 (n=1), PREDICT_CoV-35 (n=38), Bat coronavirus 512/2005 (n=216) | 21 <sup>d</sup>          |
|            |                |                   |                                     | <b>73.4% (58/79)</b> | <b>33.5% (504/1506)</b> |                                                                               | <b>47</b>                |

277 <sup>□</sup> Field rat here refers to a mix of *Rattus* sp. and *Bandicota* sp.

278 □ This environmental sample collected from a porcupine cage on a porcupine farm was barcoded as *Rattus* sp., suggesting this species  
279 was free-ranging at the site (Fig 2). The detection of a bat virus from this sample is suggestive of either environmental mixing or viral  
280 sharing.

281 <sup>c</sup> Suborder

282 <sup>d</sup> Co-infections included PREDICT\_CoV-17 with Bat coronavirus 512/2005 (n=1) and PREDICT\_CoV-35 with Bat coronavirus  
283 512/2005 (n=20).

284           Coronaviruses were detected in the field rat trade (a mix of *Rattus* and *Bandicota* genera)  
285   at all sites in Dong Thap (n=16) and Soc Trang (n=8) provinces, with 34.6% (95% CI 29.8 –  
286   39.7%, 129/373) and 33.4% (95% CI 28.4 – 38.9%, 110/329) positives respectively. The overall  
287   proportion of positives in field rats was 34.0% (95% CI 30.6 – 37.7%, 239/702), ranging from  
288   3.2% to 74.4% across sites. Field rats sampled in the rodent trade had an increasing proportion of  
289   positives along the distribution chain. Starting with traders, the proportion positive was 20.7%  
290   (95% CI 15.3 – 27.4%, 39/188), 32.0% (95% CI 27.2 – 37.1%, 116/363) in large markets, and  
291   55.6% (95% CI 47.3 – 63.6%, 84/151) at restaurants (Fig 5). The proportion of positives was  
292   higher in the wet season (36.7%, 95% CI 32.8 – 40.8%, 210/572) than the dry season (22.3%,  
293   95% CI 15.7 – 30.6%, 29/130). In a multivariate model with site as random effect, both season  
294   and interface type were significantly associated with the risk of rodent infection, with higher risk  
295   of infection in the wet season (OR=4.9, 95% CI 1.4 – 18.0), and increasing risk along the supply  
296   chain from traders (baseline) to large markets (OR=2.2, 95% CI 1.05 – 4.7), to restaurants  
297   (OR=10.0, 95% CI 2.7 – 39.5) (S2 Table). It should be noted, however, that since sites were only  
298   visited during one season, both independent variables were defined at the site level and  
299   confounding effects with other site-level characteristics cannot be excluded.

300

301   **Fig 5. Plot of the proportion of coronavirus positives in field rats by interface. Bars show**  
302   **95% confidence intervals.**

303

304           Among the positive field rats with more than one sample tested (n=220), the proportion  
305   positive by sample type was 79.9% (95% CI 73.9 – 84.9%, 175/219) in oral swabs, 52.9% (95%  
306   CI 38.6 – 66.8%, 27/51) in lung, 51.6% (95% CI 43.5 – 59.7%, 80/155) in small intestine, 31.2%

307 (95% CI 12.1 – 58.5%, 5/16) in brain, 23.1% (95% CI 6.2 – 54.0%, 3/13) in kidney, 50.0% in  
308 feces (1/2), 100% in spleen (1/1), and 0% in urine/urogenital swabs (0/1).

309 At the rodent farm interface, 6.0% (95% CI 3.8 – 9.3%, 20/331) of *Hystrix brachyura* and  
310 6.3% (95% CI 2.6 – 13.6%, 6/96) of *Rhizomys* sp. were positive. The overall proportion of  
311 positives was 6.3% (95% CI 4.3 – 9.1%, 27/429) (Table 1 and Fig 4). There was no difference  
312 among species or season and proportion positive in rodent farms, and low sample size and  
313 unequal sampling limited analysis.

314 The proportion of coronavirus positives at the two bat interfaces differed by an order of  
315 magnitude as 74.8% (95% CI 69.5 – 79.4%) of the non-invasive samples collected from  
316 *Microchiroptera* bats at bat guano farms were positive, and 6.7% (95% CI 2.2 – 17.0%) of the  
317 *Pteropus* genus samples at the natural roost in Soc Trang province (Fig 4) were positive (Table  
318 1). Pteropid bats sampled at the natural roost had higher proportions of positives in the wet  
319 season (27.3%, 95% CI 7.3 – 60.7%, 3/11) compared with the dry season (2.0%, 95% CI 0.1 –  
320 12.2%, 1/50; Fisher exact test  $p=0.02$ , OR=16.6 [1.2 – 956.8]), although low sample size and  
321 single sampling per season warrants cautious interpretation.

322

## 323 **Phylogenetic analysis**

324 Six distinct taxonomic units of coronaviruses corresponding to bat coronavirus 512/2005,  
325 Longquan aa coronavirus, avian infectious bronchitis virus (IBV), murine coronavirus,  
326 PREDICT\_CoV-17, and PREDICT\_CoV-35 were detected. All these viruses were detected  
327 using both the Watanabe and Quan assays, except IBV sequences that were detected only using  
328 the Quan protocol. Of the 504 positive animals, 433 were positive by the Watanabe assay, 410  
329 were positive by the Quan assay, and 339 were positive by both. Phylogenetic analysis showed



330 that among the six coronaviruses detected, PREDICT\_CoV-35 and bat CoV 512/2005 clustered  
331 within the *Alphacoronaviruses*, while PREDICT\_CoV-17, Longquan aa CoV and murine CoV  
332 clustered within the *Betacoronaviruses*. The virus identified within the *Gammacoronavirus*  
333 genus was avian IBV.

334 PREDICT\_CoV-17 and PREDICT\_CoV-35 were first reported by Anthony et al. [17].  
335 We found PREDICT\_CoV-17 in *Pteropus* bats and in *Microchiroptera* (Table 1). The  
336 PREDICT\_CoV-17 sequences from *Pteropus* detected in this study clustered closely with  
337 PREDICT\_CoV-17 sequences from *Pteropus giganteus* bats in Nepal and *Pteropus lylei* bats in  
338 Thailand [36] (Fig 6, S3 Table). PREDICT\_CoV-35 was found in *Microchiroptera* in bat guano  
339 farms and in a pteropid bat (Table 1). PREDICT\_CoV-35 sequences from Viet Nam clustered  
340 with other PREDICT\_CoV-35 sequences found previously in samples from hunted *Scotophilus*  
341 *kuhlii* bats in Cambodia (S3 Table; Dr. Lucy Keatts personal communication), and with  
342 sequences found in bats from an earlier study in the Mekong Delta region in Viet Nam (Fig 6).

343 Bat coronavirus 512/2005 was detected in *Microchiroptera* bat guano; and in *H.*  
344 *brachyura* (feces and environmental samples), *R. pruinosus* (feces barcoded), and *R.*  
345 *argentiventer* (barcoded environmental sample) in wildlife farms (Table 1 and S1 Table). In  
346 *Microchiroptera*, Bat coronavirus 512/2005 was frequently found in co-infection with  
347 PREDICT\_CoV-35 (Table 1, S1 Table). Network analysis showed the relationships among the  
348 bat coronavirus 512/2005 sequences from the three provinces in south Viet Nam (Fig 7). We  
349 observed two main clusters and a shallow geographic structure of genetic diversity, perhaps  
350 illustrative of sampling effort but also of localized transmission and circulation of bat  
351 coronavirus 512/2005 strains in these provinces. One cluster was exclusively detected in  
352 *Microchiroptera* and mostly restricted to Dong Thap province and another cluster included

353 sequences shared among all hosts and distributed in the three provinces (Fig 7). Parts of the  
354 network showed a star-like topology (Fig 7), typical of populations in expansion that have  
355 recently increased size. There were three sequence types that were shared among  
356 *Microchiroptera* and rodents.

357 Murine coronavirus and Longquan aa coronavirus were detected in 209 and 56 field rat  
358 samples, respectively, and 26 were coinfecting with both (Table 1). Two sequences of IBV were  
359 detected in rodent feces collected on two wildlife farms, one in a bamboo rat and another in a  
360 Malayan porcupine. The rodent interfaces where bat and avian coronaviruses were detected in  
361 feces were not full containment facilities and possibly had bats and birds flying and roosting  
362 overhead (Fig 2). The IBV positives were detected in fecal samples from wildlife farms that had  
363 chickens, pigs, and dogs on site.

364

365 **Fig 6. Phylogenetic tree of bat and rodent coronavirus sequences detected in Viet Nam.** The  
366 analysis is based on 387 bp fragment of the *RdRp* gene using maximum likelihood with the  
367 Tamura 3-parameter model, Gamma distributed with Invariant sites (G+I), and 1000 bootstrap  
368 replicates via MEGA7. The analysis included 17 sequences from this study (red from bat hosts,  
369 blue from rodent hosts), six sequences (in gray) from a previous study in Viet Nam [27], and 25  
370 reference sequences (in black) available in the GenBank database (S3 Table). The tree was  
371 rooted by a strain of Night-heron coronavirus HKU19 (GenBank accession No. NC\_016994).

372

373 **Fig 7. Median-joining networks of bat coronavirus 512/2005 *RdRp* sequences color-coded**  
374 **according to (A) host and (B) sampling location.** Each circle represents a sequence, and circle  
375 size is proportional to the number of animals sharing a sequence. Numbers on branches indicate  
376 the number of mutations between sequences (if >1). Circles are colored-coded by animal host:  
377 bat (*Microchiroptera*), rodent (*Rattus & Bandicota*, *Rhizomys*, and *Hystrix*) and sampling  
378 location (Dong Thap (blue), Dong Nai (yellow) and Soc Trang (green)). Small black circles  
379 represent median vectors (ancestral or unsampled intermediate sequence types).

380

## 381 **Discussion**

### 382 **High prevalence and amplification along the supply chain for**

### 383 **human consumption**

384       Significant findings of this study are the high proportion of coronavirus positive animals  
385 and the increasing proportion of positives found along the rodent trade supply chain from the  
386 capture site to restaurants. The transit of multiple animal species through the supply chain offers  
387 opportunities for inter- and intra-species mixing. Overcrowding and close confinement of live  
388 animals in cages results in increased animal contact, likely leading to stress. While  
389 methodologically similar to rodent surveys in Zhejiang province, China (2%), Dong Thap  
390 province, Viet Nam (4.4%), and globally (0.32%), our overall proportion of coronavirus  
391 positives was much higher among field rats (34.5%) and somewhat higher among farmed rodents  
392 (6.3%) [7,27,37]. Stress and poor nutrition likely contributes to shedding by reducing animal  
393 condition and altering immune functions [38]. Together, these factors may result in increased  
394 shedding and amplification of coronaviruses along the supply chain for human consumption.

395       The amplification of coronavirus along the supply chain may be associated with season  
396 as field rats were significantly more positive in the wet season. *Rattus argentiventer* generally  
397 reproduce year-round in Viet Nam, but are particularly abundant in the wet season (May through  
398 October) following the rice harvest when an abundance of food supports the population increase  
399 [39]. If these seasonal population increases affect density dependent contact, there could be  
400 increased coronavirus prevalence and shedding in wild field rats during certain times of the year,  
401 which could then be further amplified along the trade.

402 Our survey was not a comprehensive multi-year evaluation of the field rat supply chain  
403 and it was restricted to two provinces with this interface. These limitations mean we are not able  
404 to make inferences about larger spatial patterns or the inter-annual variability of coronavirus  
405 prevalence in wildlife populations found in this interface, which spans into neighboring  
406 Cambodia.

407 However, from a mechanistic perspective as animals progress along the wildlife supply  
408 chain, opportunity for human contact increases, including close direct contact with traders,  
409 butchers, cooks, and consumers [40]. The combination of increased coronavirus prevalence in  
410 traded wildlife and greater opportunity for human-wildlife contact as well as intra- and inter-  
411 species contact in trade systems is likely to increase the risk of zoonotic transmission of  
412 coronaviruses in wildlife markets, restaurants, and other trade interfaces.

### 413 **Viral sharing or environmental mixing**

414 We detected avian and bat coronaviruses in wildlife farm rodents, including Malayan  
415 porcupines and bamboo rats, but we did not detect rodent-associated coronaviruses. The only  
416 previously published coronavirus testing of Malayan porcupine samples carried out in China  
417 were negative [41]. It is unclear if the Malayan porcupine samples from animals screened in this  
418 study were infected with the avian or bat viruses or if environmental contamination or mixing  
419 occurred with avian and bat guano. Chickens were present at the two sites where the IBV-  
420 positive rodents were detected, and bats fly and potentially roost overhead at most farms.  
421 ‘Artificial market’ studies of influenza A viruses have found cage-stacking of species on top of  
422 other species and shared water sources facilitate viral transmission [42,43]. Nevertheless, viral  
423 sharing between species and environmental contamination or mixing (i.e. bat/bird guano landing

424 on rat feces) are two equally likely explanations for the presence of bat and avian coronaviruses  
425 detected in rodent fecal and environmental samples.

426 The field rats were co-infected with the Longquan aa coronavirus and the murine  
427 coronaviruses, both of which are from the Lineage A (*Embecovirus*) *Betacoronavirus* genus. Co-  
428 infections with multiple coronaviruses deserve particular attention as this co-occurrence may  
429 facilitate viral recombination leading to the emergence of new viruses [44,45].

430 At the very least, we conclude that rodents in the field and farmed rodent supply chains  
431 are being exposed to coronaviruses from rodents, bats, and birds and perhaps creating  
432 opportunities for coronavirus recombination events, which may lead to viruses that could spill  
433 over into humans [46]. Repeated and more direct individual sampling of these species at these  
434 interfaces would be useful to determine if viral sharing was occurring versus environmental  
435 contamination of samples.

## 436 **Bat guano farms**

437 The high proportion of positive bat feces at bat guano farms indicates the potential risk of  
438 bat guano farmers, their families, and their animals being exposed to bat coronaviruses. The  
439 overall proportion of positives (74.8%) was higher than previous studies using similar testing  
440 methods targeting bats in Viet Nam (22%), Thailand (7.6%), Lao PDR (6.5%), and Cambodia  
441 (4.85%) [27,47,48]. In this region of Viet Nam, artificial roosts are typically erected in backyard  
442 family owned plots that incorporate a mosaic of duck, goat, or pig production and crops such as  
443 guava trees or other fruit trees and large scale kitchen gardens.

444 Bats have been shown to be an important evolutionary hosts of coronaviruses, including  
445 those infecting humans [7,49–52]. Both PREDICT\_CoV-17 and PREDICT\_CoV-35 have been  
446 detected previously in the *Pteropus* and *Microchiroptera* bats in Viet Nam, Cambodia, and

447 Nepal, which confirms that coronaviruses are capable of infecting distantly related hosts [7]. The  
448 finding of the same virus in different bat species raises the question of whether they co-roost  
449 and/or share viruses through contact during other activities. Utilizing shared resources such as  
450 water or feeding on and around crops and fruit could lead to contact and facilitate a host jump.  
451 The presence of the same virus in bat species in multiple neighboring countries supports the  
452 suggestion by others that virus distribution coincides with their bat host distribution [7,53,54].  
453 While there has been no testing of the pathogenicity of these bat coronaviruses in humans or  
454 animals, they are found at close contact bat-human interfaces and further characterization is  
455 needed to understand their host range and potential for spillover. Any general persecution of bats  
456 because of zoonotic viruses they may carry can actually increase the number of susceptible bats  
457 and increase transmission risk to people [56], and would interfere with the important ecosystem  
458 services that bats provide, such as controlling insect pests of rice fields [55], plant pollination,  
459 and seed dispersal.

460

## 461 **Capacity building and outreach**

462 Beyond the viral findings, this work represented an important opportunity for capacity  
463 development in field, laboratory, and scientific disciplines, as well as opportunities for social  
464 engagement and education of high-risk communities on zoonotic disease threats. The consensus  
465 PCR approach for viral detection provides a cost-effective tool to detect emerging viruses in low-  
466 resource settings. Our work adds to the growing body of research demonstrating the utility of this  
467 approach to detect both known and novel viruses and co-infections in a variety of taxa, sample  
468 types, and interfaces. In Viet Nam, the direct result is an enhanced One Health surveillance  
469 capacity to detect important emerging or unknown viruses in humans, wildlife, and livestock. In

470 the communities with which we partnered, strong engagement enabled teams to sample a wide  
471 diversity of wild animals at high-risk interfaces. Importantly, we have returned to these same  
472 communities to share the viral findings and to educate participants with an outreach program on  
473 how to live safely with bats [57].

474

## 475 **Conclusions**

476 Large percentages of coronaviruses were detected at high risk interfaces in bats and  
477 rodents, which is of concern when assessing the potential for human exposure and spillover. The  
478 observed viral amplification along the wildlife trade supply chain for human consumption likely  
479 resulted from the mixing and close confinement of stressed live animals, such as field rats, and  
480 sheds light on the potential for coronavirus shedding in other wildlife supply chains (e.g., civets,  
481 pangolins) where similarly large numbers of animals are collected, transported, and confined.  
482 Livestock and people living in close contact with rodents, bats, and birds shedding coronaviruses  
483 provides opportunities for intra- and inter-species transmission and potential recombination of  
484 coronaviruses.

485 Human behavior is facilitating the spillover of viruses, such as coronavirus, from animals  
486 to people. The wildlife trade supply chain from the field to the restaurant provides multiple  
487 opportunities for such spillover events to occur [1]. To minimize the public health risks of viral  
488 disease emergence from wildlife and to safeguard livestock-based production systems, we  
489 recommend precautionary measures that restrict the killing, commercial breeding, transport,  
490 buying, selling, storage, processing and consuming of wild animals. The emergence of SARS-  
491 CoV, MERS-CoV, and now SARS-CoV-2 highlight the importance of the coronavirus viral

492 family to affect global public health. The world must increase vigilance through building and  
493 improving detection capacity; actively conducting surveillance to detect and characterize  
494 coronaviruses in humans, wildlife, and livestock; and to inform human behaviors in order to  
495 reduce zoonotic viral transmission to humans.

496

## 497 **Acknowledgements**

498 This study was made possible by the generous support of the American people through  
499 the United States Agency for International Development (USAID) Emerging Pandemic Threats  
500 PREDICT project (cooperative agreement numbers GHN-A-OO-09-00010-00 and AID-OAA-A-  
501 14-00102). We are thankful to the government of Viet Nam, the Wildlife Conservation Society  
502 Health team for conducting field sampling, partnering laboratories for running diagnostic tests,  
503 and many other agencies for collaborations on this project. Specifically, we would like to  
504 acknowledge Le Viet Dung, Ton Ha Quoc Dung and Nguyen Van Dung (Dong Nai Province  
505 Forest Protection Department); Vo Be Hien (Dong Thap Sub-Department of Animal Health);  
506 Quach Van Tay (Soc Trang Sub-Department of Animal Health); and the late Ngo Thanh Long  
507 (Regional Animal Health Office No. 6) for his visionary leadership and commitment to this  
508 initiative in Viet Nam. The authors are indebted to the cheerful and resourceful help of Tammie  
509 O'Rourke and Dan O'Rourke and others who developed and curated the database used to  
510 maintain PREDICT data through the Emerging Infectious Disease Information Technology Hub  
511 (EIDITH).

512



## 513 **References**

- 514 1. Lu R, Zhao X, Li J, Niu P, Yang B, Wu H, et al. Genomic characterisation and  
515 epidemiology of 2019 novel coronavirus: implications for virus origins and receptor  
516 binding. *Lancet*. 2020;395: 565–574. doi:10.1016/S0140-6736(20)30251-8
- 517 2. Aylward, Bruce (WHO); Liang W (PRC). Report of the WHO-China Joint Mission on  
518 Coronavirus Disease 2019 (COVID-19). WHO-China Jt Mission Coronavirus Dis 2019.  
519 2020;2019: 16–24. Available: [https://www.who.int/docs/default-source/coronaviruse/who-](https://www.who.int/docs/default-source/coronaviruse/who-china-joint-mission-on-covid-19-final-report.pdf)  
520 [china-joint-mission-on-covid-19-final-report.pdf](https://www.who.int/docs/default-source/coronaviruse/who-china-joint-mission-on-covid-19-final-report.pdf)
- 521 3. Bell D, Robertson S, Hunter PR. Animal origins of SARS coronavirus: possible links with  
522 the international trade in small carnivores. May RM, McLean AR, Pattison J, Weiss RA,  
523 editors. *Philos Trans R Soc London Ser B Biol Sci*. 2004;359: 1107–1114.  
524 doi:10.1098/rstb.2004.1492
- 525 4. World Health Organization. Summary of probable SARS cases with onset of illness from  
526 1 November 2002 to 31 July 2003. [cited 23 Apr 2020]. Available:  
527 [https://www.who.int/csr/sars/country/table2004\\_04\\_21/en/](https://www.who.int/csr/sars/country/table2004_04_21/en/)
- 528 5. Kober S, Mahmoud A, Lemon S, Mack A, Sivitz L, Oberholtzer K, editors. Learning  
529 from SARS: preparing for the next disease outbreak: workshop summary. The National  
530 Academies Press. Washington, DC: The National Academies Press; 2004. Available:  
531 <http://www.nap.edu/catalog/10915.htm>
- 532 6. Jackson JK, Schwarzenberg AB, Weiss MA, Nelson RM. Global Economic Effects of  
533 COVID-19. 2020. Available: <https://fas.org/sgp/crs/row/R46270.pdf>
- 534 7. Anthony SJ, Johnson CK, Greig DJ, Kramer S, Che X, Wells H, et al. Global patterns in  
535 coronavirus diversity. *Virus Evol*. 2017;3: 1–15. doi:10.1093/ve/vex012
- 536 8. Webster RG. Rapid review Wet markets — a continuing source of severe acute respiratory  
537 syndrome and influenza? *Lancet*. 2004;363: 234–236.
- 538 9. Valitutto MT, Aung O, Tun KYN, Vodzak ME, Zimmerman D, Yu JH, et al. Detection of  
539 novel coronaviruses in bats in Myanmar. *PLoS One*. 2020;15: e0230802.  
540 doi:10.1371/journal.pone.0230802
- 541 10. PREDICT Consortium. PREDICT: reducing pandemic risk, promoting global health.  
542 2014. Available:  
543 [https://ohi.sf.ucdavis.edu/sites/g/files/dgvnsk5251/files/files/page/predict-final-report-](https://ohi.sf.ucdavis.edu/sites/g/files/dgvnsk5251/files/files/page/predict-final-report-lo.pdf)  
544 [lo.pdf](https://ohi.sf.ucdavis.edu/sites/g/files/dgvnsk5251/files/files/page/predict-final-report-lo.pdf)
- 545 11. Khiem NT, Cuong LQ, Chien H Van. Market study of meat from field rats in the Mekong  
546 Delta. *Rats, Mice and People: Rodent Biology and Management*. ACIAR Monograph  
547 Series - Australian Centre for International Agriculture Research (Australia); 2003. pp.  
548 543–47.
- 549 12. Van Cuong N, Carrique-Mas J, Vo Be H, An NN, Tue NT, Anh NL, et al. Rodents and  
550 Risk in the Mekong Delta of Vietnam: Seroprevalence of Selected Zoonotic Viruses in  
551 Rodents and Humans. *Vector-Borne Zoonotic Dis*. 2015;15: 65–72.  
552 doi:10.1089/vbz.2014.1603
- 553 13. Rourke KO, Costenbader E, Packer C. A Market Chain Analysis of the Cross - Border Rat  
554 Trade between Vietnam and Cambodia - Draft Report. 2014.
- 555 14. Vann MG. Of Rats, Rice, and Race: The Great Hanoi Rat Massacre, an Episode in French  
556 Colonial History. *French Colon Hist*. 2003;4: 191–203. doi:10.1353/fch.2003.0027

- 557 15. Wildlife Conservation Society, Department VFP. Commercial wildlife farms in  
558 Vietnam: A problem or solution for conservation? Hanoi, Vietnam; 2008.
- 559 16. FAO (Food and Agriculture Organization of the United Nations). Wildlife farming in Viet  
560 Nam: Southern Viet Nam's wildlife farm survey report in a glance. 2014. Available:  
561 <http://www.fao.org/3/a-az118e.pdf>
- 562 17. Robertson SI, Tran T, Momberg F. Hunting and Trading Wildlife: An Investigation into the  
563 Wildlife Trade in and around the Pu Mat National Park, Nghe An Province, Vietnam.  
564 SFNC Project Management Unit, Nghe An, Vietnam; 2003.
- 565 18. Swift L, Hunter PR, Lees AC, Bell DJ. Wildlife Trade and the Emergence of Infectious  
566 Diseases. *Ecohealth*. 2007;4: 25. doi:10.1007/s10393-006-0076-y
- 567 19. Wacharapluesadee S, Sintunawa C, Kaewpom T, Khongnomnan K, Olival KJ, Epstein JH,  
568 et al. Group C Betacoronavirus in Bat Guano Fertilizer, Thailand. *Emerg Infect Dis*.  
569 2013;19: 1349–1351. doi:10.3201/eid1908.130119
- 570 20. Wang N, Li S-Y, Yang X-L, Huang H-M, Zhang Y-J, Guo H, et al. Serological Evidence  
571 of Bat SARS-Related Coronavirus Infection in Humans, China. *Virology*. 2018;33: 104–  
572 107. doi:10.1007/s12250-018-0012-7
- 573 21. CBNRM Learning Institute. Emerging Trends, Challenges and Innovations for CBNRM  
574 in Cambodia. CBNRM 2nd. Advanced Persistent Threat. Phnom Penh: CBNRM Learning  
575 Institute; 2009. Available:  
576 <https://static1.squarespace.com/static/593a250a15d5dbd460e153ad/t/593f6abcf7e0ab6a5540e571/1497328395206/Emerging+trends-challenges-and-innovations-English-2009.pdf>
- 577 22. Furey NM. Designing homes for tropical bats. Scientists explore artificial roosts for  
578 rebuilding forests. *Bats*. 2012;30: 7–9. Available: [http://www.batcon.org/resources/media-  
579 education/bats-magazine/bat\\_article/1127?tmpl=component](http://www.batcon.org/resources/media-education/bats-magazine/bat_article/1127?tmpl=component)
- 581 23. Chhay S. Cambodian bats: a review of farming practices and economic value of lesser  
582 Asiatic yellow house bat *Scotophilus kuhlii* (Leach, 1821), in Kandal and Takeo  
583 provinces, Cambodia. *Cambodian J Nat Hist*. 2012;2012.
- 584 24. Sothearen T, Furey NM, Jurgens JA. Effect of bat guano on the growth of five  
585 economically important plant species. *J Trop Agric*. 2014;52: 169–173.
- 586 25. Son NT, Thong VD, Tien PD, Khoi NV. Status of flying fox Bat (*Pteropus* spp.) in  
587 Vietnam. *TAP CHI SINH HOC*. 2014;31: 52–57. doi:10.15625/0866-7160/v31n3.4946
- 588 26. PREDICT Consortium. PREDICT field sampling guides. 2020 [cited 23 Apr 2020].  
589 Available: [https://ohi.vetmed.ucdavis.edu/programs-projects/predict-  
590 project/publications#Guides](https://ohi.vetmed.ucdavis.edu/programs-projects/predict-project/publications#Guides)
- 591 27. Berto A, Anh PH, Carrique-Mas JJ, Simmonds P, Van Cuong N, Tue NT, et al. Detection  
592 of potentially novel paramyxovirus and coronavirus viral RNA in bats and rats in the  
593 Mekong Delta region of southern Viet Nam. *Zoonoses Public Health*. 2018;65: 30–42.  
594 doi:10.1111/zph.12362
- 595 28. Springer MS. Phylogenetics: Bats United, Microbats Divided. *Curr Biol*. 2013;23: R999–  
596 R1001. doi:10.1016/j.cub.2013.09.053
- 597 29. Watanabe S, Masangkay JS, Nagata N, Morikawa S, Mizutani T, Fukushi S, et al. Bat  
598 Coronaviruses and Experimental Infection of Bats, the Philippines. *Emerg Infect Dis*.  
599 2010;16: 1217–1223. doi:10.3201/eid1608.100208
- 600 30. Quan P, Firth C, Street C, Henriquez JA, Petrosov A, Tashmukhamedova A, et al.  
601 Identification of a Severe Acute Respiratory Syndrome Coronavirus-Like Virus in a Leaf-  
602 Nosed Bat in Nigeria. Moscona A, editor. *MBio*. 2010;1: 1–9. doi:10.1128/mBio.00208-

- 603 10  
604 31. Hall BG. Building Phylogenetic Trees from Molecular Data with MEGA. *Mol Biol Evol.*  
605 2013;30: 1229–1235. doi:10.1093/molbev/mst012  
606 32. Bandelt HJ, Forster P, Rohl A. Median-joining networks for inferring intraspecific  
607 phylogenies. *Mol Biol Evol.* 1999;16: 37–48. doi:10.1093/oxfordjournals.molbev.a026036  
608 33. Crandall KA, Templeton AR. Empirical tests of some predictions from coalescent theory  
609 with applications to intraspecific phylogeny reconstruction. *Genetics.* 1993;134: 959–969.  
610 34. R Core Team. R: A language and environment for Statistical Computing. Vienna, Austria:  
611 R Foundation for Statistical Computing; 2020. Available: <https://www.r-project.org/>.  
612 35. Bates D, Mächler M, Bolker B, Walker S. Fitting Linear Mixed-Effects Models Using  
613 lme4. *J Stat Softw.* 2015;67. doi:10.18637/jss.v067.i01  
614 36. Wacharapluesadee S, Duengkae P, Chaiyes A, Kaewpom T, Rodpan A, Yingsakmongkon  
615 S, et al. Longitudinal study of age-specific pattern of coronavirus infection in Lyle’s  
616 flying fox (*Pteropus lylei*) in Thailand. *Virol J.* 2018;15: 38. doi:10.1186/s12985-018-  
617 0950-6  
618 37. Wang W, Lin X-D, Guo W-P, Zhou R-H, Wang M-R, Wang C-Q, et al. Discovery,  
619 diversity and evolution of novel coronaviruses sampled from rodents in China. *Virology.*  
620 2015;474: 19–27. doi:10.1016/j.virol.2014.10.017  
621 38. Huber N, Marasco V, Painer J, Vetter SG, Göritz F, Kaczensky P, et al. Leukocyte Coping  
622 Capacity: An Integrative Parameter for Wildlife Welfare Within Conservation  
623 Interventions. *Front Vet Sci.* 2019;6: 1–10. doi:10.3389/fvets.2019.00105  
624 39. Aplin KP, Brown PR, Jacob J, Krebs CJ, Singleton GR. Field methods for rodent studies  
625 in Asia and the Indo-Pacific. ACIA Monogr. Canberra, Australia; 2003. Available:  
626 <https://www.aciar.gov.au/node/8376>  
627 40. Greatorex ZF, Olson SH, Singhalath S, Silithammavong S, Khammavong K, Fine AE, et  
628 al. Wildlife Trade and Human Health in Lao PDR: An Assessment of the Zoonotic  
629 Disease Risk in Markets. Johnson CJ, editor. *PLoS One.* 2016;11: e0150666.  
630 doi:10.1371/journal.pone.0150666  
631 41. Chen H, Guan Y, Fan X. Animal reservoirs for SARS-like coronavirus in southern China.  
632 *Hong Kong Med J.* 2011;17: 36–40.  
633 42. Achenbach JE, Bowen RA. Transmission of avian influenza A viruses among species in an  
634 artificial barnyard. *PLoS One.* 2011;6. doi:10.1371/journal.pone.0017643  
635 43. Bosco-Lauth AM, Bowen RA, Root JJ. Limited transmission of emergent H7N9 influenza  
636 A virus in a simulated live animal market: Do chickens pose the principal transmission  
637 threat? *Virology.* 2016;495: 161–166. doi:10.1016/j.virol.2016.04.032  
638 44. Chu DKW, Peiris JSM, Chen H, Guan Y, Poon LLM. Genomic characterizations of bat  
639 coronaviruses (1A, 1B and HKU8) and evidence for co-infections in *Miniopterus* bats. *J*  
640 *Gen Virol.* 2008;89: 1282–1287. doi:10.1099/vir.0.83605-0  
641 45. Hu B, Zeng L-P, Yang X-L, Ge X-Y, Zhang W, Li B, et al. Discovery of a rich gene pool  
642 of bat SARS-related coronaviruses provides new insights into the origin of SARS  
643 coronavirus. Drosten C, editor. *PLOS Pathog.* 2017;13: e1006698.  
644 doi:10.1371/journal.ppat.1006698  
645 46. Su S, Wong G, Shi W, Liu J, Lai ACK, Zhou J, et al. Epidemiology, Genetic  
646 Recombination, and Pathogenesis of Coronaviruses. *Trends Microbiol.* 2016;24: 490–502.  
647 doi:10.1016/j.tim.2016.03.003  
648 47. Wacharapluesadee S, Duengkae P, Rodpan A, Kaewpom T, Maneeorn P, Kanchanasaka

- 649 B, et al. Diversity of coronavirus in bats from Eastern Thailand. *Virology*. 2015;12: 57.  
650 doi:10.1186/s12985-015-0289-1
- 651 48. Lacroix A, Duong V, Hul V, San S, Davun H, Omaliss K, et al. Genetic diversity of  
652 coronaviruses in bats in Lao PDR and Cambodia. *Infect Genet Evol*. 2017;48: 10–18.  
653 doi:10.1016/j.meegid.2016.11.029
- 654 49. Ge XY, Li JL, Yang X Lou, Chmura AA, Zhu G, Epstein JH, et al. Isolation and  
655 characterization of a bat SARS-like coronavirus that uses the ACE2 receptor. *Nature*.  
656 2013;503: 535–538. doi:10.1038/nature12711
- 657 50. Corman VM, Ithete NL, Richards LR, Schoeman MC, Preiser W, Drosten C, et al.  
658 Rooting the Phylogenetic Tree of Middle East Respiratory Syndrome Coronavirus by  
659 Characterization of a Conspecific Virus from an African Bat. *J Virol*. 2014;88: 11297–  
660 11303. doi:10.1128/JVI.01498-14
- 661 51. Corman VM, Baldwin HJ, Tateno AF, Zerbinati RM, Annan A, Owusu M, et al. Evidence  
662 for an Ancestral Association of Human Coronavirus 229E with Bats. Schultz-Cherry S,  
663 editor. *J Virol*. 2015;89: 11858–11870. doi:10.1128/JVI.01755-15
- 664 52. Huynh J, Li S, Yount B, Smith A, Sturges L, Olsen JC, et al. Evidence Supporting a  
665 Zoonotic Origin of Human Coronavirus Strain NL63. *J Virol*. 2012;86: 12816–12825.  
666 doi:10.1128/jvi.00906-12
- 667 53. Drexler JF, Corman VM, Drosten C. Ecology, evolution and classification of bat  
668 coronaviruses in the aftermath of SARS. *Antiviral Res*. 2014;101: 45–56.  
669 doi:10.1016/j.antiviral.2013.10.013
- 670 54. Breed AC, Meers J, Sendow I, Bossart KN, Barr JA, Smith I, et al. The Distribution of  
671 Henipaviruses in Southeast Asia and Australasia: Is Wallace’s Line a Barrier to Nipah  
672 Virus? Schnell MJ, editor. *PLoS One*. 2013;8: e61316. doi:10.1371/journal.pone.0061316
- 673 55. Srilopan S, Bumrungsri S, Jantarit S. The Wrinkle-Lipped Free-Tailed Bat (*Chaerephon*  
674 *plicatus* Buchannan, 1800) Feeds Mainly on Brown Planthoppers in Rice Fields of Central  
675 Thailand. *Acta Chiropterologica*. 2018;20: 207. doi:10.3161/15081109ACC2018.20.1.016
- 676 56. Amman BR, Nyakarahuka L, McElroy AK, Dodd KA, Sealy TK, Schuh AJ, et al.  
677 Marburgvirus Resurgence in Kitaka Mine Bat Population after Extermination Attempts,  
678 Uganda. *Emerg Infect Dis*. 2014;20: 1761–1764. doi:10.3201/eid2010.140696
- 679 57. Francisco L, Sullivan A, Goley J, Martinez S. Living Safely with Bats. USAID; 2018.  
680 Available: <https://p2.predict.global/living-safely-with-bats-book>  
681

## Supporting information

**S1 Table. Summary of all testing results by genus, interface, sub-interface, sample types, sites, percentage of samples testing positive, and viral species.**

**S2 Table: Multivariate mixed effect logistic regression showing the association between season and interface with coronavirus positives in field rats in the rodent trade.**

**S3 Table: GenBank accession numbers for coronavirus sequences detected in this study and for reference sequences**

**S1 Data. Data required for all analysis and metadata for each parameter is available at (pending DOI processing): <https://doi.org/10.5061/dryad.7h44j0zrj> OR <https://datadryad.org/stash/share/pk3wVUxFNzTuCYZ9t8haKRPmx7V8YhTDBuHpG8JJ9kU>**

**S1 R Code. Code used to conduct the analysis described.**



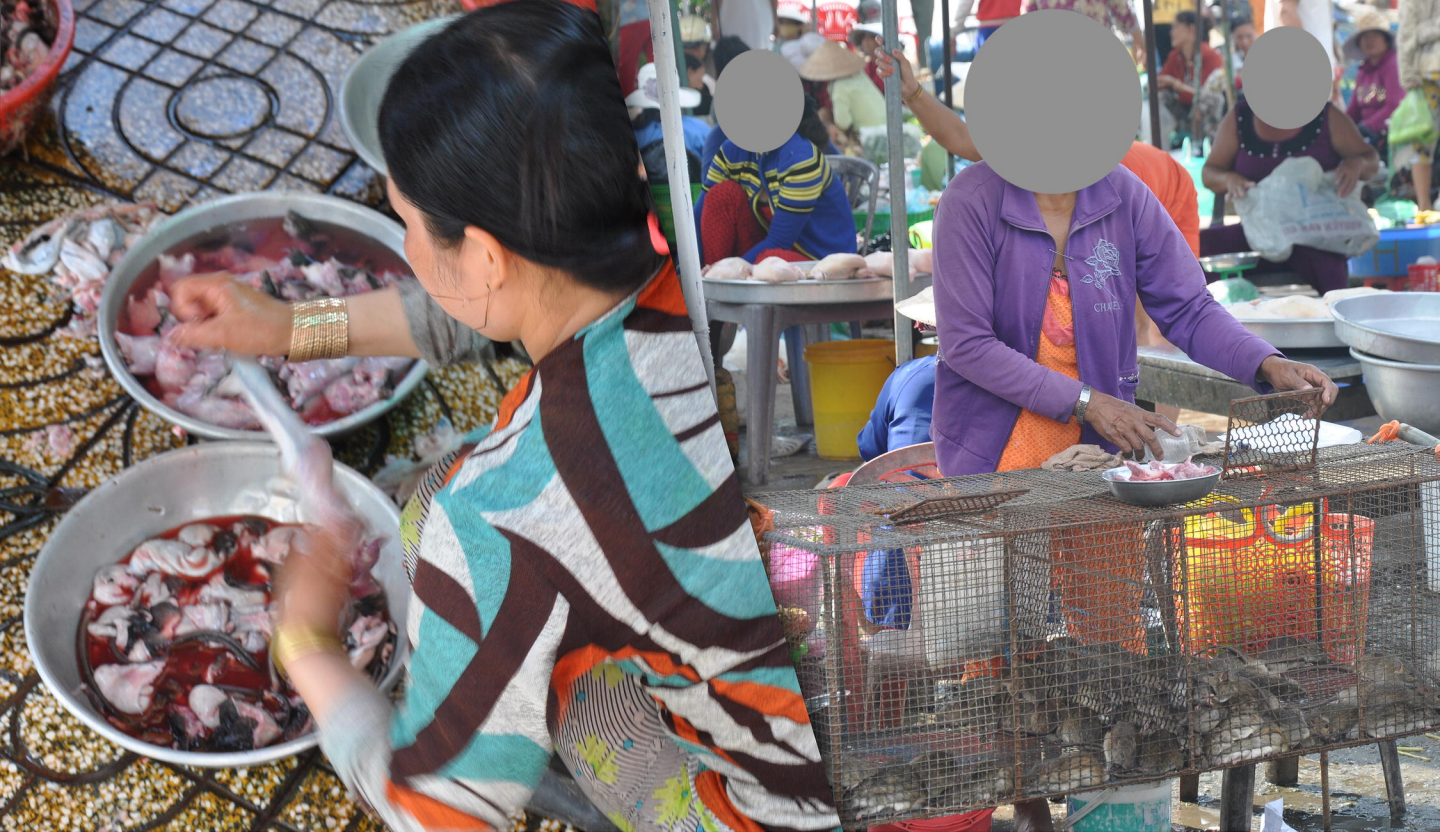

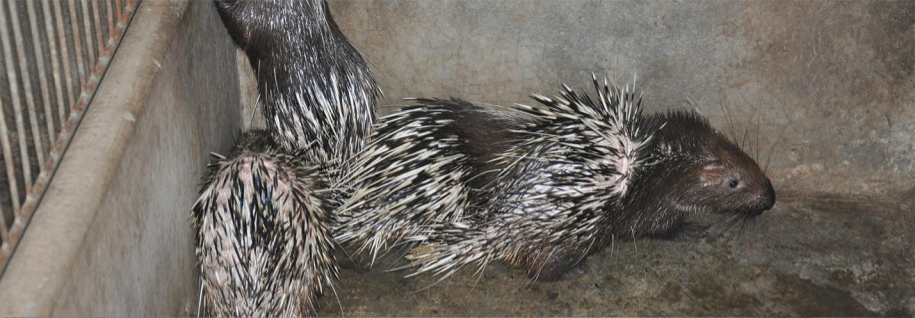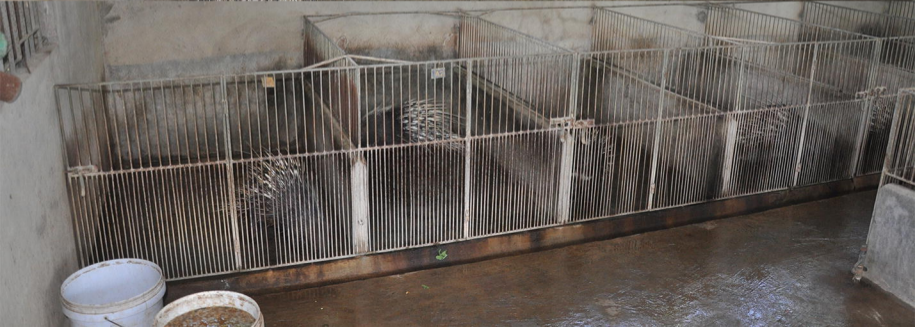



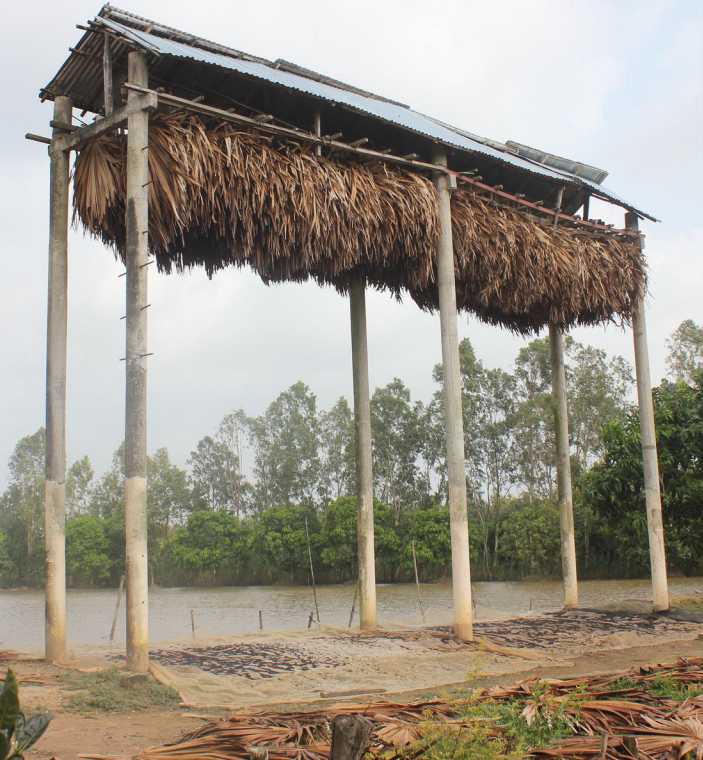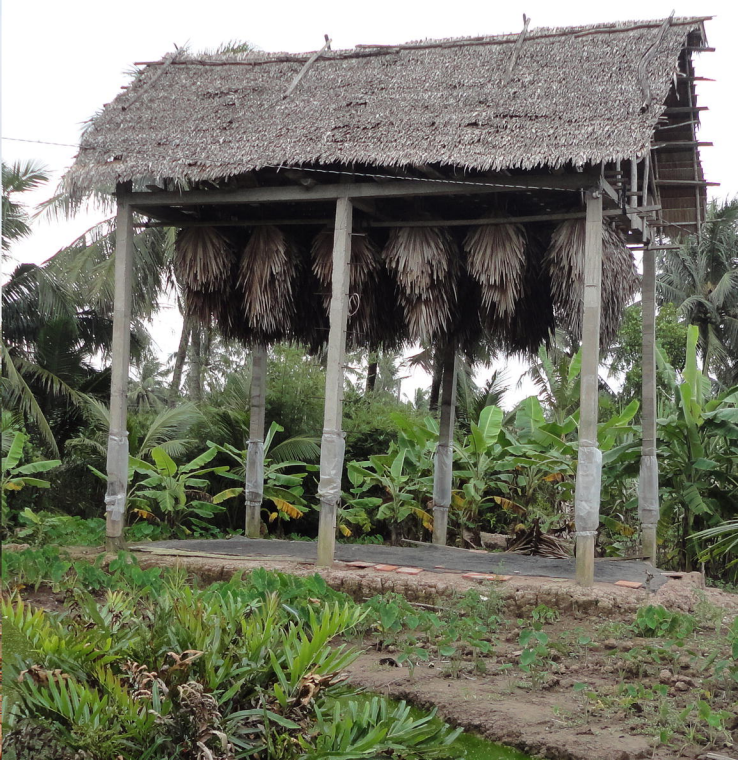



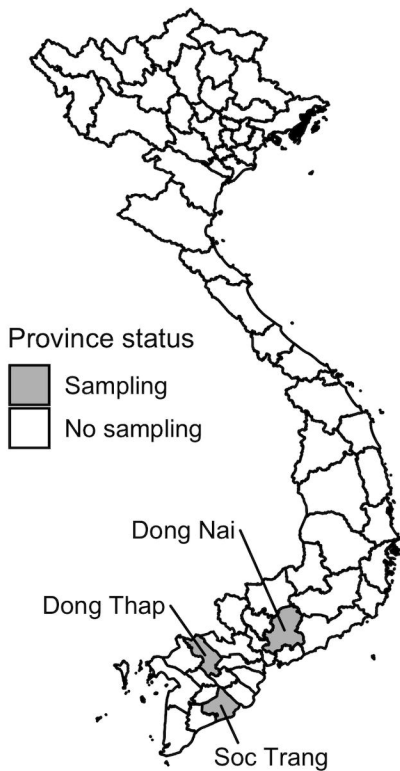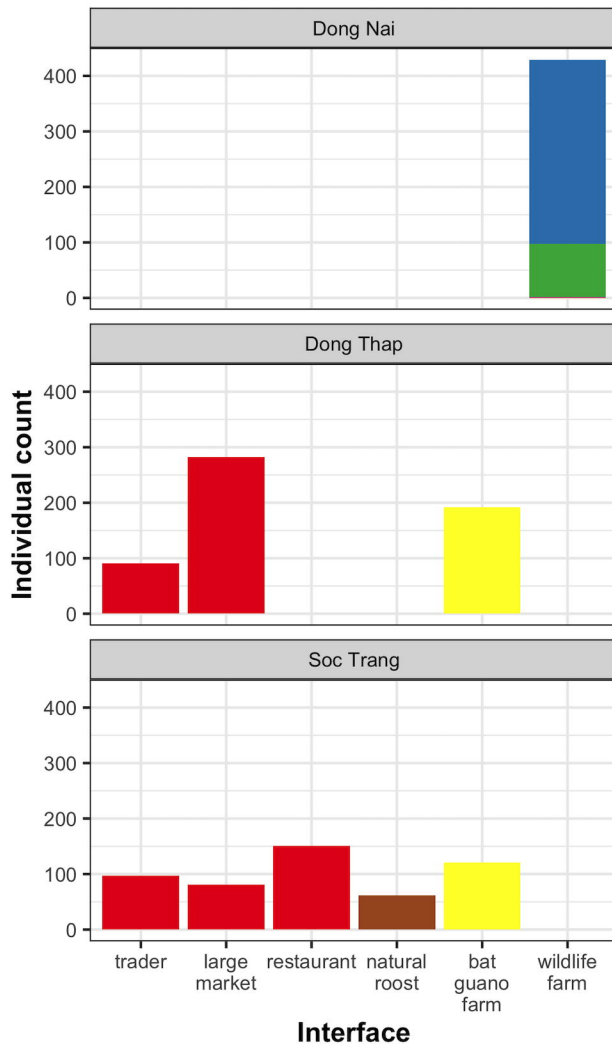

# Proportion of coronavirus-positive field rats

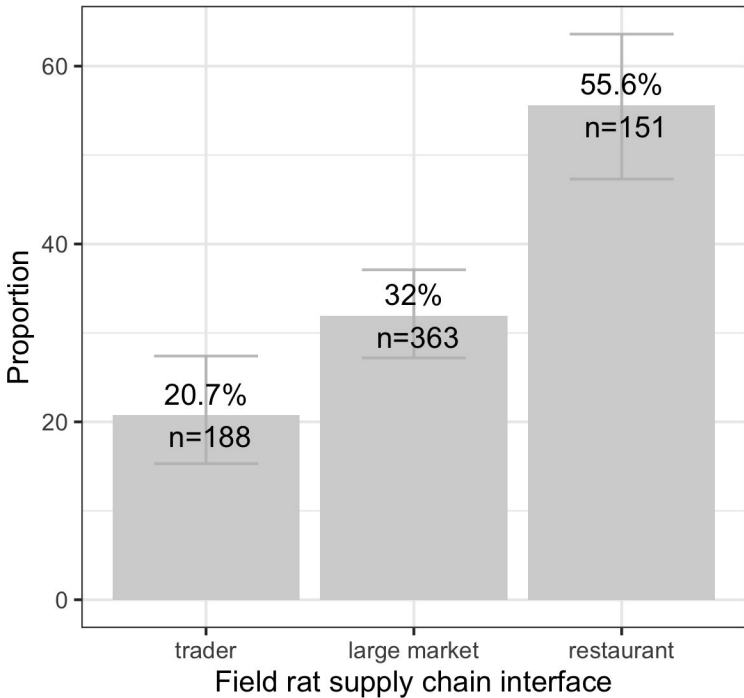

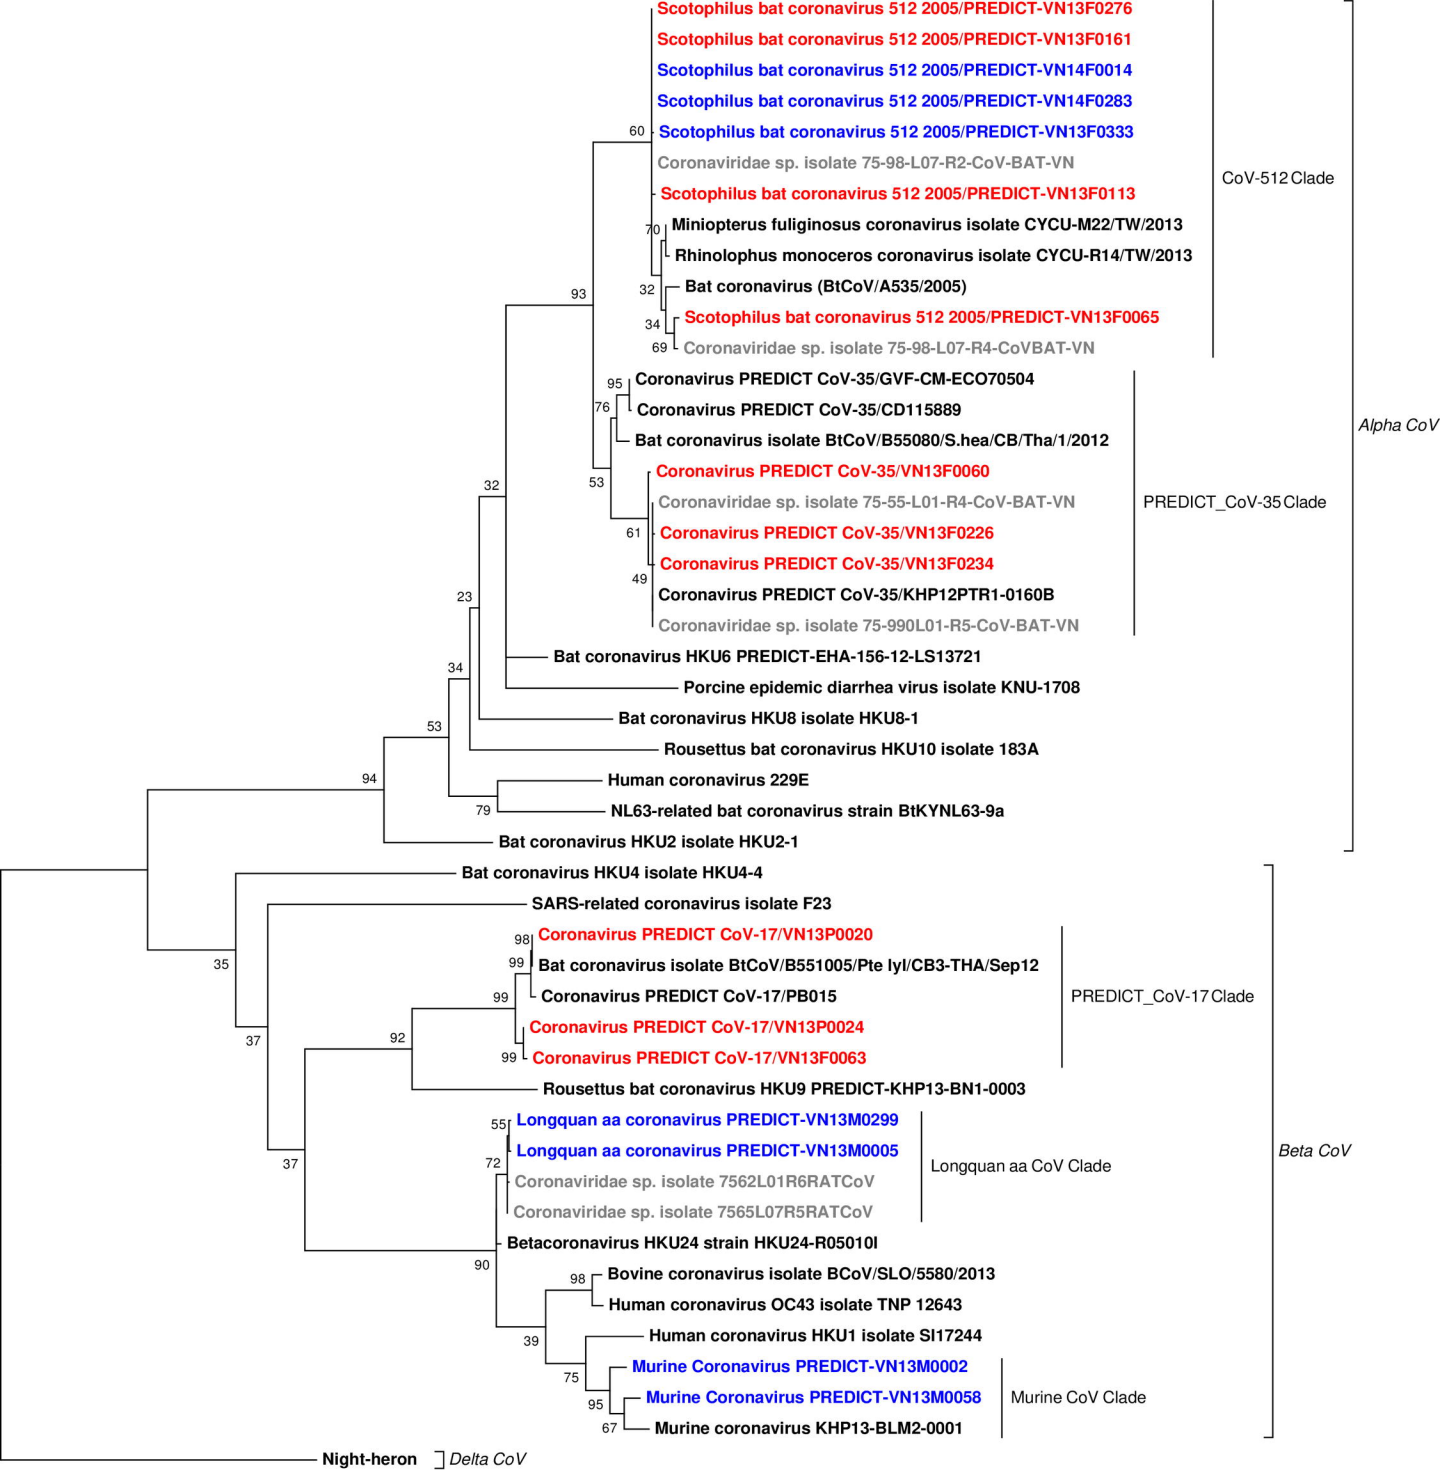

0.20

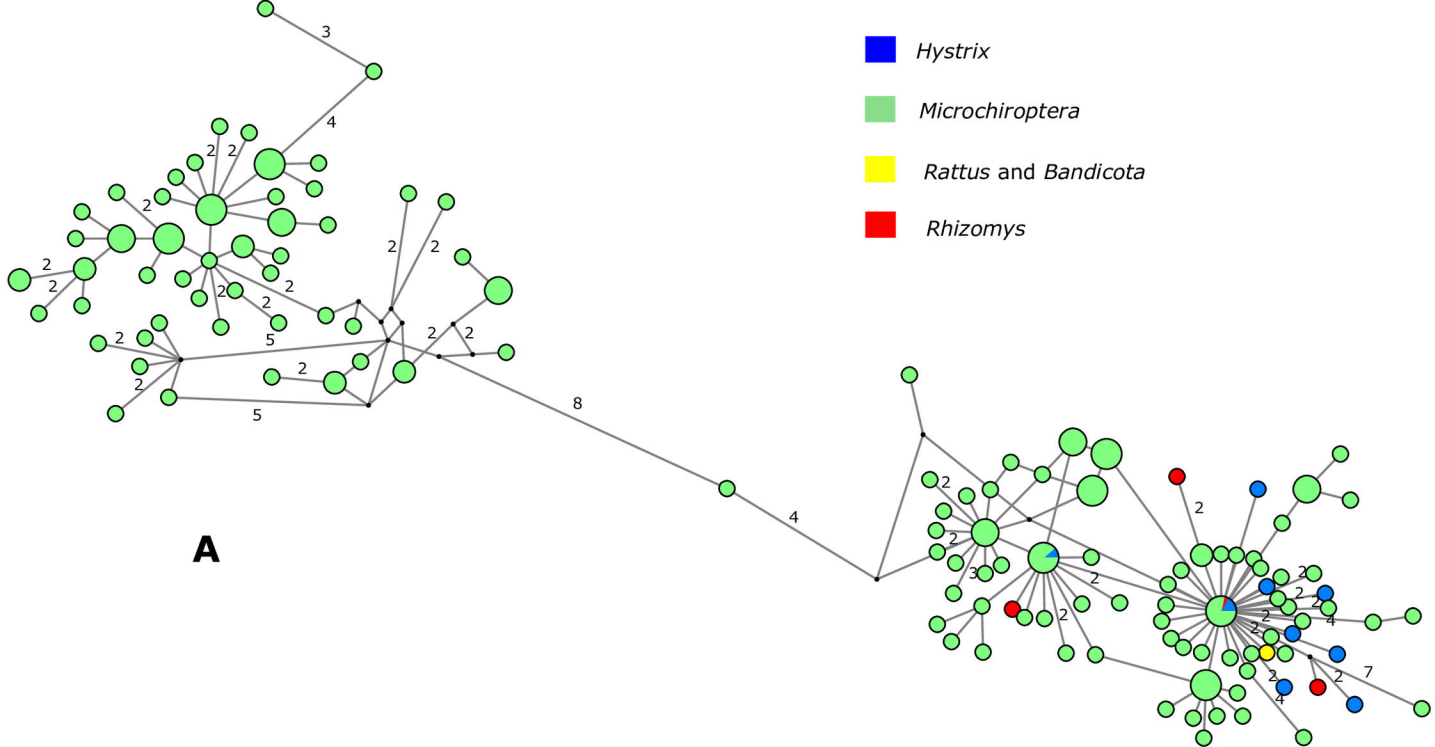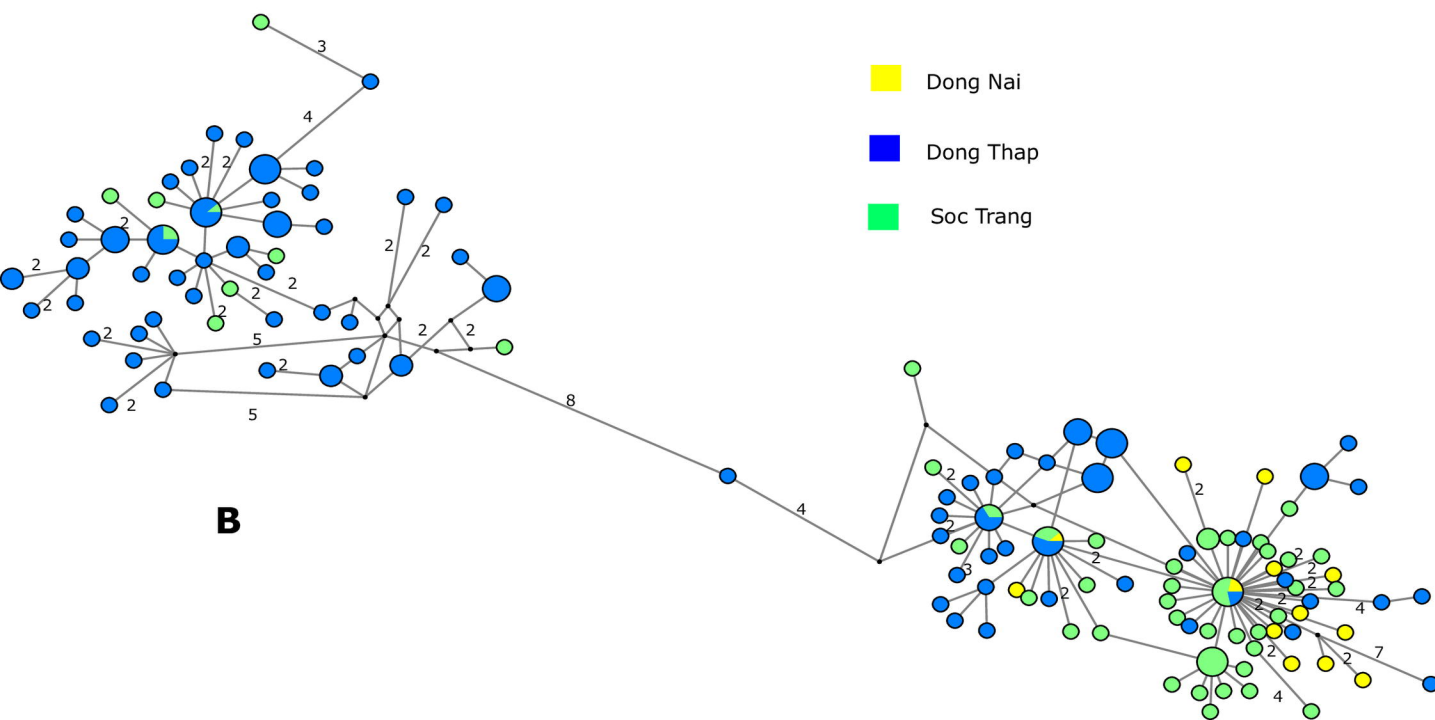

Source: https://www.biorxiv.org/content/10.1101/2020.06.05.098590v2.full.pdf
