1     Coronavirus testing indicates transmission risk increases along  
2             wildlife supply chains for human consumption in Viet Nam,  
3                                             2013-2014

4     Nguyen Quynh Huong<sup>1¶</sup>, Nguyen Thi Thanh Nga<sup>1¶</sup>, Nguyen Van Long<sup>2</sup>, Bach Duc Luu<sup>2</sup>, Alice  
5     Latinne<sup>1,3,4</sup>, Mathieu Pruvot<sup>3</sup>, Nguyen Thanh Phuong<sup>5</sup>, Le Tin Vinh Quang<sup>5</sup>, Vo Van Hung<sup>5</sup>,  
6     Nguyen Thi Lan<sup>6</sup>, Nguyen Thi Hoa<sup>6</sup>, Phan Quang Minh<sup>2</sup>, Nguyen Thi Diep<sup>2</sup>, Nguyen Tung<sup>2</sup>, Van  
7     Dang Ky<sup>2#a</sup>, Scott I. Robertson<sup>1</sup>, Hoang Bich Thuy<sup>1</sup>, Nguyen Van Long<sup>1</sup>, Martin Gilbert<sup>3,#b</sup>,  
8     Leanne Wicker<sup>1,#c</sup>, Jonna A. K. Mazet<sup>7</sup>, Christine Kreuder Johnson<sup>7</sup>, Tracey Goldstein<sup>7</sup>, Alex  
9     Tremeau-Bravard<sup>7</sup>, Victoria Ontiveros<sup>7</sup>, Damien O. Joly<sup>3,#d</sup>, Chris Walzer<sup>3,8</sup>, Amanda E.  
10    Fine<sup>1,3,&,\*</sup>, and Sarah H. Olson<sup>3,&</sup>

11  
12    <sup>1</sup> Wildlife Conservation Society, Viet Nam Country Program, Ha Noi, Viet Nam

13  
14    <sup>2</sup> Department of Animal Health, Ministry of Agricultural and Rural Development of Viet Nam,  
15    Ha Noi, Viet Nam

16  
17    <sup>3</sup> Wildlife Conservation Society, Health Program, Bronx, New York, United States of America

18  
19    <sup>4</sup> EcoHealth Alliance, New York, New York, United States of America

20  
21    <sup>5</sup> Regional Animal Health Office No. 6, Ho Chi Minh City, Viet Nam

22  
23    <sup>6</sup> Viet Nam National University of Agriculture, Faculty of Veterinary Medicine, Ha Noi, Viet  
24    Nam

25  
26    <sup>7</sup> One Health Institute, School of Veterinary Medicine, University of California, Davis,  
27    California, United States of America

28  
29    <sup>8</sup> Research Institute of Wildlife Ecology, University of Veterinary Medicine, Vienna, Austria

30  
31  
32    <sup>#a</sup>Current address: The Animal Asia Foundation Viet Nam, Ha Noi, Viet Nam

33

34 #<sup>b</sup>Current address: Cornell Wildlife Health Center, College of Veterinary Medicine, Cornell  
35 University, Ithaca, New York, United States of America

36  
37 #<sup>c</sup>Current address: Australian Wildlife Health Centre, Healesville Sanctuary, Zoos Victoria,  
38 Healesville, Victoria, Australia

39  
40 #<sup>d</sup>Current address: British Columbia Ministry of Environment and Climate Change Strategy,  
41 Victoria, British Columbia, Canada

42

43

44 \* Corresponding author

45

46 E-mail: [afine@wcs.org](mailto:afine@wcs.org) (AEF)

47

48 ¶ These authors contributed equally to this work.

49

50 & These authors also contributed equally to this work.

51

## 52 **Abstract**

53           Outbreaks of emerging coronaviruses in the past two decades and the current pandemic  
54 of a novel coronavirus (SARS-CoV-2) that emerged in China highlight the importance of this  
55 viral family as a zoonotic public health threat. To gain a better understanding of coronavirus  
56 presence and diversity in wildlife at wildlife-human interfaces in three southern provinces in Viet  
57 Nam 2013-2014, we used consensus Polymerase Chain Reactions to detect coronavirus  
58 sequences. In comparison to previous studies, we observed high proportions of positive samples  
59 among field rats (34.0%, 239/702) destined for human consumption and insectivorous bats in  
60 guano farms (74.8%, 234/313) adjacent to human dwellings. Most notably among field rats, the  
61 odds of coronavirus RNA detection significantly increased along the supply chain from field rats  
62 sold by traders (reference group; 20.7% positivity, 39/188) by a factor of 2.2 for field rats sold in  
63 large markets (32.0%, 116/363) and 10.0 for field rats sold and served in restaurants (55.6%,  
64 84/151). Coronaviruses were detected in the majority of wildlife farms (60.7%, 17/28) and in the  
65 Malayan porcupines (6.0%, 20/331) and bamboo rats (6.3%, 6/96) that are farmed. We identified  
66 six known coronaviruses in bats and rodents, clustered in three *Coronaviridae* genera, including  
67 the *Alpha-*, *Beta-*, and *Gammacoronaviruses*. Our analysis also suggested either mixing of  
68 animal excreta in the environment or interspecies transmission of coronaviruses, as both bat and  
69 avian coronaviruses were detected in rodent feces in the trade. The mixing of multiple  
70 coronaviruses, and their apparent amplification along the wildlife supply chain into restaurants,  
71 suggests maximal risk for end consumers and likely underpins the mechanisms of zoonotic  
72 spillover to people.

73

74 **Key words:** coronavirus, One Health, rodents, bats, wildlife trade, wildlife farm, Viet Nam,  
75 surveillance, guano farming, amplification

76

## 77 **Introduction**

78 Human-wildlife contact with a bat or an intermediate host species in China likely  
79 triggered a coronavirus spillover event that may have involved wildlife markets and led to the  
80 pandemic spread of SARS-CoV-2 [1,2]. The pandemic risk of commercial trade in live wildlife  
81 was first recognized during the 2002-2003 Severe Acute Respiratory Syndrome (SARS)  
82 outbreak due to SARS-CoV [3]. This virus spread to more than 29 countries in Asia, Europe, and  
83 the Americas with 8,096 people infected and 774 deaths, costing the global economy about \$US  
84 40 billion in response and control measures [4,5]. Unfortunately, the global impact of COVID-  
85 19, the disease caused by SARS-CoV-2 has reached nearly every country and greatly surpassed  
86 those numbers by many orders of magnitude [6]. While bats are thought to be the ancestral hosts  
87 for all groups of coronaviruses, including those that were previously thought to be in the rodent  
88 and avian clades [7], for both SARS-CoV and SARS-CoV-2 wildlife trade supply chains are  
89 suspected to have contributed the additional conditions necessary for the emergence, spillover,  
90 and amplification of these viruses in humans [8,9]. To better understand the presence and  
91 diversity of coronaviruses in wildlife we conducted coronavirus surveillance at high-risk  
92 interfaces in Viet Nam from 2009 to 2014 [10]. We sampled in live field rat trade (*Rattus* sp. and  
93 *Bandicota* sp.) and wildlife farm interfaces to assess risk from different wildlife supply chains  
94 destined for human consumption, and sampled bat guano farms to assess the potential

95 occupational risk of this practice given that bat guano farm artificial roost structures are often  
96 erected near human dwellings.

97         In the early 2000s, the Vietnamese field rat trade was estimated to process 3,300-3,600  
98 tons of live rats annually for consumption, a market valued at US\$2 million [11]. Although rats  
99 are still commonly traded in wet markets and sold live for food consumption along the Mekong  
100 Delta in southern Viet Nam, no recent published data on the scale and scope of the trade is  
101 available [12]. This human-wildlife interface involves the capture of wild caught field rats,  
102 subsequent trade, and consumption along a supply chain involving the entire Mekong Delta  
103 region, particularly Cambodia and Viet Nam [13]. Driving this trade are consumers in Viet Nam  
104 and Cambodia, who report eating rats at least once per week because of their good flavor, low  
105 cost, and perception of rats as ‘healthy, nutritious, natural, or disease free’ [13]. Rodent parts  
106 (heads, tails, and internal organs discarded at slaughter) are also often fed to domestic livestock  
107 or herptiles raised in captivity including frogs, snakes, and crocodiles [12]. Records of this local  
108 trade in field rats include official rat hunts, instituted by French administrators, that killed  
109 upwards of 10,000 rats a day prior to the arrival of bubonic plague in Ha Noi in 1903 [14].

110         Over the past three decades, commercial wildlife farming has developed in many  
111 countries in Southeast Asia, including Viet Nam. Although there are historic references to the  
112 occurrence of wildlife farms in Viet Nam dating back to the late 1800s, the rapid expansion in  
113 terms of farm numbers, species diversity, and scale of operations has occurred in recent decades  
114 in response to growing domestic and international demand for wildlife [15]. A 2014 survey  
115 across 12 provinces in southern Viet Nam identified 6,006 registered wildlife farms of which  
116 4,099 had active operations. The surveyed farms were stocked with approximately one million  
117 wild animals including, rodents, primates, civets, wild boar, Oriental rat-snakes, deer, crocodiles,

118 and softshell turtles. Ninety-five percent of the farms held 1-2 species of wildlife, and 70% of the  
119 farms also raised domestic animals on the same premises [16]. A key component of the wildlife  
120 farm industry in Viet Nam is the raising of wild species for meat for human consumption [16].  
121 These farms sell to urban wild meat restaurants serving increasingly affluent populations  
122 throughout the country and also supply international markets with wild meat [17]. Commercial  
123 wildlife farming in Viet Nam is part of the expanded international trade of wildlife that has been  
124 hypothesized to contribute to the cause of global epidemics, such as SARS [18] and now  
125 COVID-19.

126       Emerging evidence suggests zoonotic virus spillover risk is a concern at bat-human  
127 interfaces in Asia. Guano harvested from a cave in Thailand were positive for a group C  
128 betacoronavirus, which includes MERS-CoV, and 2.7% of 218 people living in close proximity  
129 to bats known to carry viruses related to SARS-CoV tested positive for SARS-related antibodies  
130 in China [19,20]. The traditional practice of guano farming in parts of Cambodia and Viet Nam  
131 involves the construction of artificial bat roosts in gardens or backyard farms, under which  
132 domestic animals and crops are raised, and children often play [21,22]. Cambodian development  
133 programs promoted the practice in 2004 to enhance soil fertility, reduce reliance on chemical  
134 fertilizers, generate income (\$US 0.50/kg), control insect pests, and protect the lesser Asiatic  
135 yellow bats (*Scotophilus kuhlii*) that were being hunted [21–23]. No personal protection  
136 measures are taken when harvesting the guano, which is used as fertilizer and is reported to  
137 improve the growth rate in five economically important plant species [24].

138       In this study we investigated the presence and diversity of coronavirus sequences in the  
139 field rat trade distribution chain, wildlife farms specializing in rodents for human consumption,

140 and bat guano “farms” and roosts near human dwellings to better understand the natural hosts of  
141 coronaviruses and the risk for these interfaces to facilitate spillover into humans.

142

## 143 **Materials and Methods**

### 144 **Sampling Locations**

145         Sampling was performed at multiple sites representing several high-risk interfaces for  
146 contacts among people, rodents, and bats. Rodent sampling focused on the live rodent trade  
147 supply chain and rodent farms. Along the supply chain, we targeted eight sites involved in the  
148 private sale and processing of live rodents for consumption, defined as ‘traders’ for the purpose  
149 of this study in Dong Thap and Soc Trang provinces, 14 large markets sites in Dong Thap and  
150 Soc Trang provinces (>20 vendors), and two restaurant sites in Soc Trang province (Fig 1). The  
151 28 rodent farm sites we targeted in Dong Nai province produced Malayan porcupines (*Hystrix*  
152 *brachyura*) and bamboo rats (*Rhizomys* sp.) for human consumption (Fig 2). Other species  
153 observed or raised at the wildlife farm sites included dogs, cattle, pigs, chickens, ducks, pigeons,  
154 geese, common pheasant, monitor lizards, wild boar, fish, python, crocodiles, deer, civets, non-  
155 human primates as pets or part of private collections, free-flying wild birds, and free-ranging  
156 peri-domestic rodents.

157

158 **Fig 1. Slaughtering rodents (left) and rodent market (right) in Dong Thap province,**  
159 **October 2013.**

160

161 **Fig 2. Malayan porcupines (*Hystrix brachyura*) farm in Dong Nai province, November**  
162 **2013.**

163

164 Bat sampling occurred at bat guano “farms” and a natural bat roost located at a religious  
165 site. Bat guano farms consisted of artificial roosts constructed with a concrete base and pillars  
166 topped with fronds of coconut palm or Asian Palmyra Palm (*Borassus flabellifer*) (Fig 3).  
167 Seventeen bat guano farms were sampled in the two provinces of Dong Thap and Soc Trang. The  
168 natural bat roost was located at a religious site in Soc Trang province known as the “bat pagoda”,  
169 where *Pteropus* sp. have historically roosted in trees protected from hunting, and light and noise  
170 pollution [25].

171

### 172 **Fig 3. Bat guano farms in Soc Trang Province, October 2013.**

173

174 All study sampling occurred from January 2013 to March 2014 at 41 sites in the wet  
175 (south Viet Nam: May 1<sup>st</sup> - November 30<sup>th</sup>) and 30 in the dry (south Viet Nam: December 1<sup>st</sup> -  
176 April 30<sup>th</sup>) seasons. Given the distances between sites, all sites were sampled once except the bat  
177 pagoda natural roost in Soc Trang province, which was visited three times and sampled in both  
178 seasons.

### 179 **Animal sampling**

180 Samples were humanely collected using standard and previously published protocols  
181 [26]. Feces, swabs of the pen floors, and urine/urogenital swabs were collected from rodents at  
182 wildlife farms. Samples were classified as ‘fecal sample’ when collected from animals housed  
183 individually, and as ‘environmental sample’ when collected below cages housing multiple  
184 individuals. Samples from rodents in the trade included primarily oral swabs in addition to  
185 tissues (i.e. brain, kidney, lung, and small intestine), rectal swabs, and urine/urogenital swabs.  
186 These samples were collected from individual carcasses after the rodents were slaughtered by a



187 market vendor, trader, or restaurant kitchen staff. However, the rodents were usually butchered at  
188 a common site for each observed time period that was only cleaned intermittently following the  
189 trader's, vendor's, or restaurant's regular practices. Oral swabs were taken from the severed  
190 heads, and additional tissue samples were collected from the internal organs and the  
191 gastrointestinal tracts which were removed during the butchering process.

192 Fecal samples and a small number of urine samples from bats in guano farms and the  
193 natural roost site were collected on clean plastic cover sheets within 1-2 hours after placement  
194 under bat roosts, and thus each sample may represent one or multiple bats. Oral and rectal swabs  
195 were also collected from live-captured bats at the natural pagoda roost site.

196 Animals were identified in the field to the lowest taxonomic level possible based on  
197 morphological characteristics, and species was identified in a subset of animals through genetic  
198 barcoding [15]. Due to difficulty of morphologic identification in the field, unless barcoded,  
199 rodents (*Rattus argentiventer*, *R. tanezumi*, *R. norvegicus*, *R. exulans*, *R. losea*, and *Bandicota*  
200 *indica*; [12,27]) were categorized as “field rats”. Bats were classified as “*Microchiroptera*”  
201 following the traditional taxonomic classification (new classification of two new suborders  
202 *Yangochiroptera* and *Yinpterochiroptera*, was only published near the end of the study, so for  
203 consistency we used the historical classification [28]).

204 All samples were collected in cryotubes containing RNAlater (RNA stabilization reagent,  
205 Qiagen), and stored in liquid nitrogen in the field before being transported to the laboratory for  
206 storage at -80 °C. Samples were tested by the Regional Animal Health Office No. 6 (RAHO6)  
207 laboratory in Ho Chi Minh City. The study was approved by the Department of Animal Health of  
208 the Ministry of Agriculture and Rural Development and protocols were reviewed by the

209 Institutional Animal Care and Use Committee at the University of California at Davis (protocol  
210 number 16048).

## 211 **Sample Testing**

212 RNA was extracted (RNA MiniPrep Kit, Sigma-Aldrich) and cDNA transcribed  
213 (SuperScript III First Strand cDNA Synthesis System, Invitrogen). Coronavirus RNA was  
214 detected using two broadly reactive consensus nested-PCR assays targeting the *RNA dependent*  
215 *RNA polymerase (RdRp)* gene [29,30]. The positive control was a synthetic plasmid containing  
216 the primer-binding sites for both assays. Distilled water was used as a negative control and  
217 included in each test batch. PCR products were visualized using 1.5% agarose gels, and bands of  
218 the correct size were excised, cloned, and sequenced by Sanger dideoxy sequencing using the  
219 same primers as for amplification.

## 220 **Phylogenetic analysis**

221 For sequence analysis and classification operating taxonomic units were defined with a  
222 cut off of 90% identity, i.e. virus sequences that shared less than 90% identity to a known  
223 sequence were labelled sequentially as PREDICT\_CoV-1, -2, -3, etc. and groups sharing  $\geq 90\%$   
224 identity to a sequence already in GenBank were given the same name as the matching sequence  
225 [7]. A phylogenetic tree was constructed for sequences amplified using the Watanabe protocol,  
226 as this PCR protocol yielded longer sequences and more positive results than the Quan protocol.  
227 Several representative sequences for each viral species found in our study were included for  
228 analysis and are available in GenBank (Table S3). Alignments were performed using MUSCLE,  
229 and trees were constructed using Maximum likelihood and the Tamura 3-parameter model in  
230 MEGA7 [31]. The best-fit model of DNA substitution was selected in MEGA7 using BIC scores  
231 (Bayesian Information Criterion) and Maximum Likelihood values (*lnL*). Bootstrap values were

232 calculated after 1000 replicates. In addition, a median-joining network was constructed using  
233 Network 5.0.0.3 [32] to explore phylogenetic relationships among bat coronavirus 512/2005  
234 sequences at the intraspecies level, as haplotype networks may better represent the relationships  
235 among viral sequences with low sequence diversity compared with phylogenetic trees [33].

## 236 **Statistical analyses**

237 Visualization of sampling locations in provinces in Viet Nam, along with the distribution  
238 by species and interface was constructed with the ggmap, ggplot2, and sp packages [34]. All  
239 analyses were done using R version 3.5.0 or higher (R Development Core Team, Vienna,  
240 Austria). Data (S1 Data) and code (S1 R Code) are available in the supplementary materials. The  
241 effect of risk factors (season, sub-interface type) was examined and limited to interfaces for  
242 which the distribution of samples across factors could support the analysis. These included  
243 season for *Pteropus* bat samples collected in the bat pagoda natural roost and the effect of season  
244 and sub-interface for samples collected in the rodent trade in southern Viet Nam. Given the low  
245 sample size, the effect of season for *Pteropus* bats samples positive for coronaviruses was  
246 assessed using a Fisher exact test. The effect of season (dry, wet, with dry season as reference  
247 category) and sub-interface type (trader, large markets, restaurants, with trader as reference  
248 category) in traded rodent samples positive for coronaviruses was assessed with a mixed effect  
249 multivariable logistic regression, with sites as random effect (i.e. grouping variable) using the  
250 lme4 R package [35]. A p-value of less than 0.05 was considered statistically significant. The  
251 95% binomial confidence intervals for proportions were calculated using binom.test in R.

252 The comparison of the proportion of coronavirus positives in different sample types was  
253 performed on positive individuals sampled in the rodent trade with multiple sample types

254 collected per individual. We then calculated the proportion of individuals positive for each  
255 sample type, as a proxy for the probability of detection by each sample type.

## 256 257 **Results**

### 258 **Detection of coronavirus by animal taxa and interface**

259 A total of 2,164 samples collected between January 2013 and March 2014 from rodents  
260 and bats were tested for coronaviruses (Table 1, S1 Table). Assuming that non-invasive samples  
261 from bats and farmed rodents represented unique distinct individuals, these samples came from  
262 1,506 individuals, including 1,131 rodents and 375 bats from 70 sites sampled in Dong Thap,  
263 Soc Trang, and Dong Nai provinces in the southern region near the Mekong River Delta (Fig 4).

264

265 **Fig 4. Map of sampling sites by province and multi-panel plots showing individual counts**  
266 **of animals sampled by province, taxa, and interface.** The color of each bar represents the  
267 animal taxonomic group sampled in Dong Nai, Dong Thap, and Soc Trang provinces. *Sciuridae*  
268 and *Rattus argentiventer* were only sampled one time apiece from wildlife farms.

269

270 Out of 70 sites, coronavirus positives were detected at 58 including 100% (24/24) of live  
271 rodent trade sites, 60.7% (17/28) of rodent wildlife farm sites, 94.1% (16/17) of bat guano farm  
272 sites, and at the one natural pteropid bat roost. Wildlife farms were only sampled in Dong Nai  
273 province and the live rodent trade and bat interfaces were sampled in Dong Thap and Soc Trang  
274 provinces (Fig 4).

275 **Table 1: Summary of coronavirus positives by taxa and interface. Co-infection is defined as the detection of two different**  
 276 **coronavirus taxonomic units in an individual animal.**  
 277

| Taxa group | Interface      | Sub-interface     | Taxa group                          | % site positive      | % individual positive   | Viral species                                                                 | # of co-infected animals |
|------------|----------------|-------------------|-------------------------------------|----------------------|-------------------------|-------------------------------------------------------------------------------|--------------------------|
| Rodents    | Rodent trade   | Trader            | Field rat <sup>a</sup>              | 100% (8/8)           | 20.7% (39/188)          | Murine coronavirus (n=36), Longquan aa coronavirus (n=5)                      | 2                        |
|            |                | Large market      | Field rat <sup>a</sup>              | 100% (14/14)         | 32.0% (116/363)         | Murine coronavirus (n=103), Longquan aa coronavirus (n=31)                    | 18                       |
|            |                | Restaurant        | Field rat <sup>a</sup>              | 100% (2/2)           | 55.6% (84/151)          | Murine coronavirus (n=70), Longquan aa coronavirus (n=20)                     | 6                        |
|            | Wildlife farm  |                   | <i>Hystrix</i> sp.                  | 47.8% (11/23)        | 6.0% (20/331)           | Bat coronavirus 512/2005 (n=19), Infectious bronchitis virus (IBV) (n=1)      | 0                        |
|            |                |                   | <i>Rhizomys</i> sp.                 | 45.5% (5/11)         | 6.3% (6/96)             | Bat coronavirus 512/2005 (n=5), Infectious bronchitis virus (IBV) (n=1)       | 0                        |
|            |                |                   | <i>Rattus</i> sp. <sup>b</sup>      | 100% (1/1)           | 100% (1/1)              | Bat coronavirus 512/2005 (n=1)                                                | 0                        |
|            |                |                   | <i>Sciuridae</i> sp.                | 0% (0/1)             | 0% (0/1)                |                                                                               |                          |
| Bats       | Human dwelling | Natural bat roost |                                     |                      |                         |                                                                               |                          |
|            |                |                   | <i>Pteropus</i> sp.                 | 100% (1/1)           | 6.7% (4/60)             | PREDICT_CoV-17 (n=3), PREDICT_CoV-35 (n=1)                                    | 0                        |
|            |                |                   | <i>Cynopterus horsfieldii</i>       | 0% (0/1)             | 0% (0/2)                |                                                                               |                          |
|            |                | Bat guano farm    | <i>Microchiroptera</i> <sup>c</sup> | 94.1% (16/17)        | 74.8% (234/313)         | PREDICT_CoV-17 (n=1), PREDICT_CoV-35 (n=38), Bat coronavirus 512/2005 (n=216) | 21 <sup>d</sup>          |
|            |                |                   |                                     | <b>82.9% (58/70)</b> | <b>33.5% (504/1506)</b> |                                                                               | <b>47</b>                |

278 <sup>a</sup> Field rat here refers to a mix of *Rattus* sp. and *Bandicota* sp.

279 <sup>b</sup> This environmental sample collected from a porcupine cage on a porcupine farm was barcoded as *Rattus* sp., suggesting this species  
280 was free-ranging at the site (Fig 2). The detection of a bat virus from this sample is suggestive of either environmental mixing or viral  
281 sharing.  
282 <sup>c</sup> Suborder  
283 <sup>d</sup> Co-infections included PREDICT\_CoV-17 with Bat coronavirus 512/2005 (n=1) and PREDICT\_CoV-35 with Bat coronavirus  
284 512/2005 (n=20).

285           Coronaviruses were detected in the field rat trade (a mix of *Rattus* and *Bandicota* genera)  
286   at all sites in Dong Thap (n=16) and Soc Trang (n=8) provinces, with 34.6% (95% CI 29.8 –  
287   39.7%, 129/373) and 33.4% (95% CI 28.4 – 38.9%, 110/329) positives respectively. The overall  
288   proportion of positives in field rats was 34.0% (95% CI 30.6 – 37.7%, 239/702), ranging from  
289   3.2% to 74.4% across sites. Field rats sampled in the rodent trade had an increasing proportion of  
290   positives along the distribution chain. Starting with traders, the proportion positive was 20.7%  
291   (95% CI 15.3 – 27.4%, 39/188), 32.0% (95% CI 27.2 – 37.1%, 116/363) in large markets, and  
292   55.6% (95% CI 47.3 – 63.6%, 84/151) at restaurants (Fig 5). The proportion of positives was  
293   higher in the wet season (36.7%, 95% CI 32.8 – 40.8%, 210/572) than the dry season (22.3%,  
294   95% CI 15.7 – 30.6%, 29/130). In a multivariate model with site as random effect, both season  
295   and interface type were significantly associated with the risk of rodent infection, with higher risk  
296   of infection in the wet season (OR=4.9, 95% CI 1.4 – 18.0), and increasing risk along the supply  
297   chain from traders (baseline) to large markets (OR=2.2, 95% CI 1.05 – 4.7), to restaurants  
298   (OR=10.0, 95% CI 2.7 – 39.5) (S2 Table). It should be noted, however, that since sites were only  
299   visited during one season, both independent variables were defined at the site level and  
300   confounding effects with other site-level characteristics cannot be excluded.

301

302   **Fig 5. Plot of the proportion of coronavirus positives in field rats by interface. Bars show**  
303   **95% confidence intervals.**

304

305           Among the positive field rats with more than one sample tested (n=220), the proportion  
306   positive by sample type was 79.9% (95% CI 73.9 – 84.9%, 175/219) in oral swabs, 52.9% (95%  
307   CI 38.6 – 66.8%, 27/51) in lung, 51.6% (95% CI 43.5 – 59.7%, 80/155) in small intestine, 31.2%

308 (95% CI 12.1 – 58.5%, 5/16) in brain, 23.1% (95% CI 6.2 – 54.0%, 3/13) in kidney, 50.0% in  
309 feces (1/2), 100% in spleen (1/1), and 0% in urine/urogenital swabs (0/1).

310 At the rodent farm interface, 6.0% (95% CI 3.8 – 9.3%, 20/331) of *Hystrix brachyura* and  
311 6.3% (95% CI 2.6 – 13.6%, 6/96) of *Rhizomys* sp. were positive. The overall proportion of  
312 positives was 6.3% (95% CI 4.3 – 9.1%, 27/429) (Table 1 and Fig 4). There was no difference  
313 among species or season and proportion positive in rodent farms, and low sample size and  
314 unequal sampling limited analysis.

315 The proportion of coronavirus positives at the two bat interfaces differed by an order of  
316 magnitude as 74.8% (95% CI 69.5 – 79.4%) of the non-invasive samples collected from  
317 *Microchiroptera* bats at bat guano farms were positive, and 6.7% (95% CI 2.2 – 17.0%) of the  
318 *Pteropus* genus samples at the natural roost in Soc Trang province (Fig 4) were positive (Table  
319 1). Pteropid bats sampled at the natural roost had higher proportions of positives in the wet  
320 season (27.3%, 95% CI 7.3 – 60.7%, 3/11) compared with the dry season (2.0%, 95% CI 0.1 –  
321 12.2%, 1/50; Fisher exact test  $p=0.02$ , OR=16.6 [1.2 – 956.8]), although low sample size and  
322 single sampling per season warrants cautious interpretation.

323

## 324 **Phylogenetic analysis**

325 Six distinct taxonomic units of coronaviruses corresponding to bat coronavirus 512/2005,  
326 Longquan aa coronavirus, avian infectious bronchitis virus (IBV), murine coronavirus,  
327 PREDICT\_CoV-17, and PREDICT\_CoV-35 were detected. All these viruses were detected  
328 using both the Watanabe and Quan assays, except IBV sequences that were detected only using  
329 the Quan protocol. Of the 504 positive animals, 433 were positive by the Watanabe assay, 410  
330 were positive by the Quan assay, and 339 were positive by both. Phylogenetic analysis showed



331 that among the six coronaviruses detected, PREDICT\_CoV-35 and bat CoV 512/2005 clustered  
332 within the *Alphacoronaviruses*, while PREDICT\_CoV-17, Longquan aa CoV and murine CoV  
333 clustered within the *Betacoronaviruses*. The virus identified within the *Gammacoronavirus*  
334 genus was avian IBV.

335 PREDICT\_CoV-17 and PREDICT\_CoV-35 were first reported by Anthony et al. [17].  
336 We found PREDICT\_CoV-17 in *Pteropus* bats and in *Microchiroptera* (Table 1). The  
337 PREDICT\_CoV-17 sequences from *Pteropus* detected in this study clustered closely with  
338 PREDICT\_CoV-17 sequences from *Pteropus giganteus* bats in Nepal and *Pteropus lylei* bats in  
339 Thailand [36] (Fig 6, S3 Table). PREDICT\_CoV-35 was found in *Microchiroptera* in bat guano  
340 farms and in a pteropid bat (Table 1). PREDICT\_CoV-35 sequences from Viet Nam clustered  
341 with other PREDICT\_CoV-35 sequences found previously in samples from hunted *Scotophilus*  
342 *kuhlii* bats in Cambodia (S3 Table; Dr. Lucy Keatts personal communication), and with  
343 sequences found in bats from an earlier study in the Mekong Delta region in Viet Nam (Fig 6).

344 Bat coronavirus 512/2005 was detected in *Microchiroptera* bat guano; and in *H.*  
345 *brachyura* (feces and environmental samples), *R. pruinosus* (feces barcoded), and *R.*  
346 *argentiventer* (barcoded environmental sample) in wildlife farms (Table 1 and S1 Table). In  
347 *Microchiroptera*, Bat coronavirus 512/2005 was frequently found in co-infection with  
348 PREDICT\_CoV-35 (Table 1, S1 Table). Network analysis showed the relationships among the  
349 bat coronavirus 512/2005 sequences from the three provinces in south Viet Nam (Fig 7). We  
350 observed two main clusters and a shallow geographic structure of genetic diversity, perhaps  
351 illustrative of sampling effort but also of localized transmission and circulation of bat  
352 coronavirus 512/2005 strains in these provinces. One cluster was exclusively detected in  
353 *Microchiroptera* and mostly restricted to Dong Thap province and another cluster included

354 sequences shared among all hosts and distributed in the three provinces (Fig 7). Parts of the  
355 network showed a star-like topology (Fig 7), typical of populations in expansion that have  
356 recently increased size. There were three sequence types that were shared among  
357 *Microchiroptera* and rodents.

358 Murine coronavirus and Longquan aa coronavirus were detected in 209 and 56 field rat  
359 samples, respectively, and 26 were coinfecting with both (Table 1). Two sequences of IBV were  
360 detected in rodent feces collected on two wildlife farms, one in a bamboo rat and another in a  
361 Malayan porcupine. The rodent interfaces where bat and avian coronaviruses were detected in  
362 feces were not full containment facilities and possibly had bats and birds flying and roosting  
363 overhead (Fig 2). The IBV positives were detected in fecal samples from wildlife farms that had  
364 chickens, pigs, and dogs on site.

365

366 **Fig 6. Phylogenetic tree of bat and rodent coronavirus sequences detected in Viet Nam.** The  
367 analysis is based on 387 bp fragment of the *RdRp* gene using maximum likelihood with the  
368 Tamura 3-parameter model, Gamma distributed with Invariant sites (G+I), and 1000 bootstrap  
369 replicates via MEGA7. The analysis included 17 sequences from this study (red from bat hosts,  
370 blue from rodent hosts), six sequences (in gray) from a previous study in Viet Nam [27], and 25  
371 reference sequences (in black) available in the GenBank database (S3 Table). The tree was  
372 rooted by a strain of Night-heron coronavirus HKU19 (GenBank accession No. NC\_016994).

373

374 **Fig 7. Median-joining networks of bat coronavirus 512/2005 *RdRp* sequences color-coded**  
375 **according to (A) host and (B) sampling location.** Each circle represents a sequence, and circle  
376 size is proportional to the number of animals sharing a sequence. Numbers on branches indicate  
377 the number of mutations between sequences (if >1). Circles are colored-coded by animal host:  
378 bat (*Microchiroptera*), rodent (*Rattus & Bandicota*, *Rhizomys*, and *Hystrix*) and sampling  
379 location (Dong Thap (blue), Dong Nai (yellow) and Soc Trang (green)). Small black circles  
380 represent median vectors (ancestral or unsampled intermediate sequence types).

381

## 382 **Discussion**

### 383 **High prevalence and amplification along the supply chain for** 384 **human consumption**

385         Significant findings of this study are the high proportion of coronavirus positive animals  
386 and the increasing proportion of positives found along the rodent trade supply chain from the  
387 capture site to restaurants. The transit of multiple animal species through the supply chain offers  
388 opportunities for inter- and intra-species mixing. Overcrowding and close confinement of live  
389 animals in cages results in increased animal contact, likely leading to stress. While  
390 methodologically similar to rodent surveys in Zhejiang province, China (2%), Dong Thap  
391 province, Viet Nam (4.4%), and globally (0.32%), our overall proportion of coronavirus  
392 positives was much higher among field rats (34.5%) and somewhat higher among farmed rodents  
393 (6.3%) [7,27,37]. Stress and poor nutrition likely contributes to shedding by reducing animal  
394 condition and altering immune functions [38]. Together, these factors may result in increased  
395 shedding and amplification of coronaviruses along the supply chain for human consumption.

396         The amplification of coronavirus along the supply chain may be associated with season  
397 as field rats were significantly more positive in the wet season. *Rattus argentiventer* generally  
398 reproduce year-round in Viet Nam, but are particularly abundant in the wet season (May through  
399 October) following the rice harvest when an abundance of food supports the population increase  
400 [39]. If these seasonal population increases affect density dependent contact, there could be  
401 increased coronavirus prevalence and shedding in wild field rats during certain times of the year,  
402 which could then be further amplified along the trade.

403 Our survey was not a comprehensive multi-year evaluation of the field rat supply chain  
404 and it was restricted to two provinces with this interface. These limitations mean we are not able  
405 to make inferences about larger spatial patterns or the inter-annual variability of coronavirus  
406 prevalence in wildlife populations found in this interface, which spans into neighboring  
407 Cambodia.

408 However, from a mechanistic perspective as animals progress along the wildlife supply  
409 chain, opportunity for human contact increases, including close direct contact with traders,  
410 butchers, cooks, and consumers [40]. The combination of increased coronavirus prevalence in  
411 traded wildlife and greater opportunity for human-wildlife contact as well as intra- and inter-  
412 species contact in trade systems is likely to increase the risk of zoonotic transmission of  
413 coronaviruses in wildlife markets, restaurants, and other trade interfaces.

## 414 **Viral sharing or environmental mixing**

415 We detected avian and bat coronaviruses in wildlife farm rodents, including Malayan  
416 porcupines and bamboo rats, but we did not detect rodent-associated coronaviruses. The only  
417 previously published coronavirus testing of Malayan porcupine samples carried out in China  
418 were negative [41]. It is unclear if the Malayan porcupine samples from animals screened in this  
419 study were infected with the avian or bat viruses or if environmental contamination or mixing  
420 occurred with avian and bat guano. Chickens were present at the two sites where the IBV-  
421 positive rodents were detected, and bats fly and potentially roost overhead at most farms.  
422 ‘Artificial market’ studies of influenza A viruses have found cage-stacking of species on top of  
423 other species and shared water sources facilitate viral transmission [42,43]. Nevertheless, viral  
424 sharing between species and environmental contamination or mixing (i.e. bat/bird guano landing

425 on rat feces) are two equally likely explanations for the presence of bat and avian coronaviruses  
426 detected in rodent fecal and environmental samples.

427 The field rats were co-infected with the Longquan aa coronavirus and the murine  
428 coronaviruses, both of which are from the Lineage A (*Embecovirus*) *Betacoronavirus* genus. Co-  
429 infections with multiple coronaviruses deserve particular attention as this co-occurrence may  
430 facilitate viral recombination leading to the emergence of new viruses [44,45].

431 At the very least, we conclude that rodents in the field and farmed rodent supply chains  
432 are being exposed to coronaviruses from rodents, bats, and birds and perhaps creating  
433 opportunities for coronavirus recombination events, which may lead to viruses that could spill  
434 over into humans [46]. Repeated and more direct individual sampling of these species at these  
435 interfaces would be useful to determine if viral sharing was occurring versus environmental  
436 contamination of samples.

### 437 **Bat guano farms**

438 The high proportion of positive bat feces at bat guano farms indicates the potential risk of  
439 bat guano farmers, their families, and their animals being exposed to bat coronaviruses. The  
440 overall proportion of positives (74.8%) was higher than previous studies using similar testing  
441 methods targeting bats in Viet Nam (22%), Thailand (7.6%), Lao PDR (6.5%), and Cambodia  
442 (4.85%) [27,47,48]. In this region of Viet Nam, artificial roosts are typically erected in backyard  
443 family owned plots that incorporate a mosaic of duck, goat, or pig production and crops such as  
444 guava trees or other fruit trees and large scale kitchen gardens.

445 Bats have been shown to be an important evolutionary hosts of coronaviruses, including  
446 those infecting humans [7,49–52]. Both PREDICT\_CoV-17 and PREDICT\_CoV-35 have been  
447 detected previously in the *Pteropus* and *Microchiroptera* bats in Viet Nam, Cambodia, and

448 Nepal, which confirms that coronaviruses are capable of infecting distantly related hosts [7]. The  
449 finding of the same virus in different bat species raises the question of whether they co-roost  
450 and/or share viruses through contact during other activities. Utilizing shared resources such as  
451 water or feeding on and around crops and fruit could lead to contact and facilitate a host jump.  
452 The presence of the same virus in bat species in multiple neighboring countries supports the  
453 suggestion by others that virus distribution coincides with their bat host distribution [7,53,54].  
454 While there has been no testing of the pathogenicity of these bat coronaviruses in humans or  
455 animals, they are found at close contact bat-human interfaces and further characterization is  
456 needed to understand their host range and potential for spillover. Any general persecution of bats  
457 because of zoonotic viruses they may carry can actually increase the number of susceptible bats  
458 and increase transmission risk to people [56], and would interfere with the important ecosystem  
459 services that bats provide, such as controlling insect pests of rice fields [55], plant pollination,  
460 and seed dispersal.

461

## 462 **Capacity building and outreach**

463 Beyond the viral findings, this work represented an important opportunity for capacity  
464 development in field, laboratory, and scientific disciplines, as well as opportunities for social  
465 engagement and education of high-risk communities on zoonotic disease threats. The consensus  
466 PCR approach for viral detection provides a cost-effective tool to detect emerging viruses in low-  
467 resource settings. Our work adds to the growing body of research demonstrating the utility of this  
468 approach to detect both known and novel viruses and co-infections in a variety of taxa, sample  
469 types, and interfaces. In Viet Nam, the direct result is an enhanced One Health surveillance  
470 capacity to detect important emerging or unknown viruses in humans, wildlife, and livestock. In

471 the communities with which we partnered, strong engagement enabled teams to sample a wide  
472 diversity of wild animals at high-risk interfaces. Importantly, we have returned to these same  
473 communities to share the viral findings and to educate participants with an outreach program on  
474 how to live safely with bats [57].

475

## 476 **Conclusions**

477 Large percentages of coronaviruses were detected at high risk interfaces in bats and  
478 rodents, which is of concern when assessing the potential for human exposure and spillover. The  
479 observed viral amplification along the wildlife trade supply chain for human consumption likely  
480 resulted from the mixing and close confinement of stressed live animals, such as field rats, and  
481 sheds light on the potential for coronavirus shedding in other wildlife supply chains (e.g., civets,  
482 pangolins) where similarly large numbers of animals are collected, transported, and confined.  
483 Livestock and people living in close contact with rodents, bats, and birds shedding coronaviruses  
484 provides opportunities for intra- and inter-species transmission and potential recombination of  
485 coronaviruses.

486 Human behavior is facilitating the spillover of viruses, such as coronavirus, from animals  
487 to people. The wildlife trade supply chain from the field to the restaurant provides multiple  
488 opportunities for such spillover events to occur [1]. To minimize the public health risks of viral  
489 disease emergence from wildlife and to safeguard livestock-based production systems, we  
490 recommend precautionary measures that restrict the killing, commercial breeding, transport,  
491 buying, selling, storage, processing and consuming of wild animals. The emergence of SARS-  
492 CoV, MERS-CoV, and now SARS-CoV-2 highlight the importance of the coronavirus viral

493 family to affect global public health. The world must increase vigilance through building and  
494 improving detection capacity; actively conducting surveillance to detect and characterize  
495 coronaviruses in humans, wildlife, and livestock; and to inform human behaviors in order to  
496 reduce zoonotic viral transmission to humans.

497

## 498 **Acknowledgements**

499 This study was made possible by the generous support of the American people through  
500 the United States Agency for International Development (USAID) Emerging Pandemic Threats  
501 PREDICT project (cooperative agreement numbers GHN-A-OO-09-00010-00 and AID-OAA-A-  
502 14-00102). We are thankful to the government of Viet Nam, the Wildlife Conservation Society  
503 Health team for conducting field sampling, partnering laboratories for running diagnostic tests,  
504 and many other agencies for collaborations on this project. Specifically, we would like to  
505 acknowledge Le Viet Dung, Ton Ha Quoc Dung and Nguyen Van Dung (Dong Nai Province  
506 Forest Protection Department); Vo Be Hien (Dong Thap Sub-Department of Animal Health);  
507 Quach Van Tay (Soc Trang Sub-Department of Animal Health); and the late Ngo Thanh Long  
508 (Regional Animal Health Office No. 6) for his visionary leadership and commitment to this  
509 initiative in Viet Nam. The authors are indebted to the cheerful and resourceful help of Tammie  
510 O'Rourke and Dan O'Rourke and others who developed and curated the database used to  
511 maintain PREDICT data through the Emerging Infectious Disease Information Technology Hub  
512 (EIDITH).

513



## 514 References

- 515 1. Lu R, Zhao X, Li J, Niu P, Yang B, Wu H, et al. Genomic characterisation and  
516 epidemiology of 2019 novel coronavirus: implications for virus origins and receptor  
517 binding. *Lancet*. 2020;395: 565–574. doi:10.1016/S0140-6736(20)30251-8
- 518 2. Aylward, Bruce (WHO); Liang W (PRC). Report of the WHO-China Joint Mission on  
519 Coronavirus Disease 2019 (COVID-19). WHO-China Jt Mission Coronavirus Dis 2019.  
520 2020;2019: 16–24. Available: [https://www.who.int/docs/default-source/coronaviruse/who-](https://www.who.int/docs/default-source/coronaviruse/who-china-joint-mission-on-covid-19-final-report.pdf)  
521 [china-joint-mission-on-covid-19-final-report.pdf](https://www.who.int/docs/default-source/coronaviruse/who-china-joint-mission-on-covid-19-final-report.pdf)
- 522 3. Bell D, Robertson S, Hunter PR. Animal origins of SARS coronavirus: possible links with  
523 the international trade in small carnivores. May RM, McLean AR, Pattison J, Weiss RA,  
524 editors. *Philos Trans R Soc London Ser B Biol Sci*. 2004;359: 1107–1114.  
525 doi:10.1098/rstb.2004.1492
- 526 4. World Health Organization. Summary of probable SARS cases with onset of illness from  
527 1 November 2002 to 31 July 2003. [cited 23 Apr 2020]. Available:  
528 [https://www.who.int/csr/sars/country/table2004\\_04\\_21/en/](https://www.who.int/csr/sars/country/table2004_04_21/en/)
- 529 5. Knobel S, Mahmoud A, Lemon S, Mack A, Sivitz L, Oberholtzer K, editors. Learning  
530 from SARS: preparing for the next disease outbreak: workshop summary. The National  
531 Academies Press. Washington, DC: The National Academies Press; 2004. Available:  
532 <http://www.nap.edu/catalog/10915.htm>
- 533 6. Jackson JK, Schwarzenberg AB, Weiss MA, Nelson RM. Global Economic Effects of  
534 COVID-19. 2020. Available: <https://fas.org/sgp/crs/row/R46270.pdf>
- 535 7. Anthony SJ, Johnson CK, Greig DJ, Kramer S, Che X, Wells H, et al. Global patterns in  
536 coronavirus diversity. *Virus Evol*. 2017;3: 1–15. doi:10.1093/ve/vex012
- 537 8. Webster RG. Rapid review Wet markets — a continuing source of severe acute respiratory  
538 syndrome and influenza ? *Lancet*. 2004;363: 234–236.
- 539 9. Valitutto MT, Aung O, Tun KYN, Vodzak ME, Zimmerman D, Yu JH, et al. Detection of  
540 novel coronaviruses in bats in Myanmar. *PLoS One*. 2020;15: e0230802.  
541 doi:10.1371/journal.pone.0230802
- 542 10. PREDICT Consortium. PREDICT: reducing pandemic risk, promoting global health.  
543 2014. Available:  
544 [https://ohi.sf.ucdavis.edu/sites/g/files/dgvnsk5251/files/files/page/predict-final-report-](https://ohi.sf.ucdavis.edu/sites/g/files/dgvnsk5251/files/files/page/predict-final-report-lo.pdf)  
545 [lo.pdf](https://ohi.sf.ucdavis.edu/sites/g/files/dgvnsk5251/files/files/page/predict-final-report-lo.pdf)
- 546 11. Khiem NT, Cuong LQ, Chien H Van. Market study of meat from field rats in the Mekong  
547 Delta. *Rats, Mice and People: Rodent Biology and Management*. ACIAR Monograph  
548 Series - Australian Centre for International Agriculture Research (Australia); 2003. pp.  
549 543–47.
- 550 12. Van Cuong N, Carrique-Mas J, Vo Be H, An NN, Tue NT, Anh NL, et al. Rodents and  
551 Risk in the Mekong Delta of Vietnam: Seroprevalence of Selected Zoonotic Viruses in  
552 Rodents and Humans. *Vector-Borne Zoonotic Dis*. 2015;15: 65–72.  
553 doi:10.1089/vbz.2014.1603
- 554 13. Rourke KO, Costenbader E, Packer C. A Market Chain Analysis of the Cross - Border Rat  
555 Trade between Vietnam and Cambodia - Draft Report. 2014.
- 556 14. Vann MG. Of Rats, Rice, and Race: The Great Hanoi Rat Massacre, an Episode in French  
557 Colonial History. *French Colon Hist*. 2003;4: 191–203. doi:10.1353/fch.2003.0027

- 558 15. Wildlife Conservation Society, Department VFP. Commercial wildlife farms in Vietnam :  
559 A problem or solution for conservation? Hanoi, Vietnam; 2008.
- 560 16. FAO (Food and Agriculture Organization of the United Nations). Wildlife farming in Viet  
561 Nam: Southern Viet Nam's wildlife farm survey report in a glance. 2014. Available:  
562 <http://www.fao.org/3/a-az118e.pdf>
- 563 17. Robertson SI, Tran T, Momberg F. Hunting and Trading Wildlife: An Investigation into the  
564 Wildlife Trade in and around the Pu Mat National Park, Nghe An Province, Vietnam.  
565 SFNC Project Management Unit, Nghe An, Vietnam; 2003.
- 566 18. Swift L, Hunter PR, Lees AC, Bell DJ. Wildlife Trade and the Emergence of Infectious  
567 Diseases. *Ecohealth*. 2007;4: 25. doi:10.1007/s10393-006-0076-y
- 568 19. Wacharapluesadee S, Sintunawa C, Kaewpom T, Khongnomnan K, Olival KJ, Epstein JH,  
569 et al. Group C Betacoronavirus in Bat Guano Fertilizer, Thailand. *Emerg Infect Dis*.  
570 2013;19: 1349–1351. doi:10.3201/eid1908.130119
- 571 20. Wang N, Li S-Y, Yang X-L, Huang H-M, Zhang Y-J, Guo H, et al. Serological Evidence  
572 of Bat SARS-Related Coronavirus Infection in Humans, China. *Virology*. 2018;33: 104–  
573 107. doi:10.1007/s12250-018-0012-7
- 574 21. CBNRM Learning Institute. Emerging Trends, Challenges and Innovations for CBNRM  
575 in Cambodia. CBNRM 2nd. Advanced Persistent Threat. Phnom Penh: CBNRM Learning  
576 Institute; 2009. Available:  
577 [https://static1.squarespace.com/static/593a250a15d5dbd460e153ad/t/593f6abcf7e0ab6a55](https://static1.squarespace.com/static/593a250a15d5dbd460e153ad/t/593f6abcf7e0ab6a5540e571/1497328395206/Emerging+trends-challenges-and-innovations-English-2009.pdf)  
578 [40e571/1497328395206/Emerging+trends-challenges-and-innovations-English-2009.pdf](https://static1.squarespace.com/static/593a250a15d5dbd460e153ad/t/593f6abcf7e0ab6a5540e571/1497328395206/Emerging+trends-challenges-and-innovations-English-2009.pdf)
- 579 22. Furey NM. Designing homes for tropical bats. Scientists explore artificial roosts for  
580 rebuilding forests. *Bats*. 2012;30: 7–9. Available: [http://www.batcon.org/resources/media-](http://www.batcon.org/resources/media-education/bats-magazine/bat_article/1127?tmpl=component)  
581 [education/bats-magazine/bat\\_article/1127?tmpl=component](http://www.batcon.org/resources/media-education/bats-magazine/bat_article/1127?tmpl=component)
- 582 23. Chhay S. Cambodian bats: a review of farming practices and economic value of lesser  
583 Asiatic yellow house bat *Scotophilus kuhlii* (Leach, 1821), in Kandal and Takeo  
584 provinces, Cambodia. *Cambodian J Nat Hist*. 2012;2012.
- 585 24. Sothearen T, Furey NM, Jurgens JA. Effect of bat guano on the growth of five  
586 economically important plant species. *J Trop Agric*. 2014;52: 169–173.
- 587 25. Son NT, Thong VD, Tien PD, Khoi NV. Status of flying fox Bat (*Pteropus* spp.) in  
588 Vietnam. *TAP CHI SINH HOC*. 2014;31: 52–57. doi:10.15625/0866-7160/v31n3.4946
- 589 26. PREDICT Consortium. PREDICT field sampling guides. 2020 [cited 23 Apr 2020].  
590 Available: [https://ohi.vetmed.ucdavis.edu/programs-projects/predict-](https://ohi.vetmed.ucdavis.edu/programs-projects/predict-project/publications#Guides)  
591 [project/publications#Guides](https://ohi.vetmed.ucdavis.edu/programs-projects/predict-project/publications#Guides)
- 592 27. Berto A, Anh PH, Carrique-Mas JJ, Simmonds P, Van Cuong N, Tue NT, et al. Detection  
593 of potentially novel paramyxovirus and coronavirus viral RNA in bats and rats in the  
594 Mekong Delta region of southern Viet Nam. *Zoonoses Public Health*. 2018;65: 30–42.  
595 doi:10.1111/zph.12362
- 596 28. Springer MS. Phylogenetics: Bats United, Microbats Divided. *Curr Biol*. 2013;23: R999–  
597 R1001. doi:10.1016/j.cub.2013.09.053
- 598 29. Watanabe S, Masangkay JS, Nagata N, Morikawa S, Mizutani T, Fukushi S, et al. Bat  
599 Coronaviruses and Experimental Infection of Bats, the Philippines. *Emerg Infect Dis*.  
600 2010;16: 1217–1223. doi:10.3201/eid1608.100208
- 601 30. Quan P, Firth C, Street C, Henriquez JA, Petrosov A, Tashmukhamedova A, et al.  
602 Identification of a Severe Acute Respiratory Syndrome Coronavirus-Like Virus in a Leaf-  
603 Nosed Bat in Nigeria. Moscona A, editor. *MBio*. 2010;1: 1–9. doi:10.1128/mBio.00208-

- 604 10
- 605 31. Hall BG. Building Phylogenetic Trees from Molecular Data with MEGA. *Mol Biol Evol.*
- 606 2013;30: 1229–1235. doi:10.1093/molbev/mst012
- 607 32. Bandelt HJ, Forster P, Rohl A. Median-joining networks for inferring intraspecific
- 608 phylogenies. *Mol Biol Evol.* 1999;16: 37–48. doi:10.1093/oxfordjournals.molbev.a026036
- 609 33. Crandall KA, Templeton AR. Empirical tests of some predictions from coalescent theory
- 610 with applications to intraspecific phylogeny reconstruction. *Genetics.* 1993;134: 959–969.
- 611 34. R Core Team. R: A language and environment for Statistical Computing. Vienna, Austria:
- 612 R Foundation for Statistical Computing; 2020. Available: <https://www.r-project.org/>.
- 613 35. Bates D, Mächler M, Bolker B, Walker S. Fitting Linear Mixed-Effects Models Using
- 614 lme4. *J Stat Softw.* 2015;67. doi:10.18637/jss.v067.i01
- 615 36. Wacharapluesadee S, Duengkae P, Chaiyes A, Kaewpom T, Rodpan A, Yingsakmongkon
- 616 S, et al. Longitudinal study of age-specific pattern of coronavirus infection in Lyle’s
- 617 flying fox (*Pteropus lylei*) in Thailand. *Virology.* 2018;15: 38. doi:10.1186/s12985-018-
- 618 0950-6
- 619 37. Wang W, Lin X-D, Guo W-P, Zhou R-H, Wang M-R, Wang C-Q, et al. Discovery,
- 620 diversity and evolution of novel coronaviruses sampled from rodents in China. *Virology.*
- 621 2015;474: 19–27. doi:10.1016/j.virol.2014.10.017
- 622 38. Huber N, Marasco V, Painer J, Vetter SG, Göritz F, Kaczensky P, et al. Leukocyte Coping
- 623 Capacity: An Integrative Parameter for Wildlife Welfare Within Conservation
- 624 Interventions. *Front Vet Sci.* 2019;6: 1–10. doi:10.3389/fvets.2019.00105
- 625 39. Aplin KP, Brown PR, Jacob J, Krebs CJ, Singleton GR. Field methods for rodent studies
- 626 in Asia and the Indo-Pacific. ACIA Monogr. Canberra, Australia; 2003. Available:
- 627 <https://www.aciar.gov.au/node/8376>
- 628 40. Greatorex ZF, Olson SH, Singhalath S, Silithammavong S, Khammavong K, Fine AE, et
- 629 al. Wildlife Trade and Human Health in Lao PDR: An Assessment of the Zoonotic
- 630 Disease Risk in Markets. Johnson CJ, editor. *PLoS One.* 2016;11: e0150666.
- 631 doi:10.1371/journal.pone.0150666
- 632 41. Chen H, Guan Y, Fan X. Animal reservoirs for SARS-like coronavirus in southern China.
- 633 *Hong Kong Med J.* 2011;17: 36–40.
- 634 42. Achenbach JE, Bowen RA. Transmission of avian influenza A viruses among species in an
- 635 artificial barnyard. *PLoS One.* 2011;6. doi:10.1371/journal.pone.0017643
- 636 43. Bosco-Lauth AM, Bowen RA, Root JJ. Limited transmission of emergent H7N9 influenza
- 637 A virus in a simulated live animal market: Do chickens pose the principal transmission
- 638 threat? *Virology.* 2016;495: 161–166. doi:10.1016/j.virol.2016.04.032
- 639 44. Chu DKW, Peiris JSM, Chen H, Guan Y, Poon LLM. Genomic characterizations of bat
- 640 coronaviruses (1A, 1B and HKU8) and evidence for co-infections in *Miniopterus* bats. *J*
- 641 *Gen Virol.* 2008;89: 1282–1287. doi:10.1099/vir.0.83605-0
- 642 45. Hu B, Zeng L-P, Yang X-L, Ge X-Y, Zhang W, Li B, et al. Discovery of a rich gene pool
- 643 of bat SARS-related coronaviruses provides new insights into the origin of SARS
- 644 coronavirus. Drosten C, editor. *PLOS Pathog.* 2017;13: e1006698.
- 645 doi:10.1371/journal.ppat.1006698
- 646 46. Su S, Wong G, Shi W, Liu J, Lai ACK, Zhou J, et al. Epidemiology, Genetic
- 647 Recombination, and Pathogenesis of Coronaviruses. *Trends Microbiol.* 2016;24: 490–502.
- 648 doi:10.1016/j.tim.2016.03.003
- 649 47. Wacharapluesadee S, Duengkae P, Rodpan A, Kaewpom T, Maneeorn P, Kanchanasaka

- 650 B, et al. Diversity of coronavirus in bats from Eastern Thailand. *Virology*. 2015;12: 57.  
651 doi:10.1186/s12985-015-0289-1
- 652 48. Lacroix A, Duong V, Hul V, San S, Davun H, Omaliss K, et al. Genetic diversity of  
653 coronaviruses in bats in Lao PDR and Cambodia. *Infect Genet Evol*. 2017;48: 10–18.  
654 doi:10.1016/j.meegid.2016.11.029
- 655 49. Ge XY, Li JL, Yang X Lou, Chmura AA, Zhu G, Epstein JH, et al. Isolation and  
656 characterization of a bat SARS-like coronavirus that uses the ACE2 receptor. *Nature*.  
657 2013;503: 535–538. doi:10.1038/nature12711
- 658 50. Corman VM, Ithete NL, Richards LR, Schoeman MC, Preiser W, Drosten C, et al.  
659 Rooting the Phylogenetic Tree of Middle East Respiratory Syndrome Coronavirus by  
660 Characterization of a Conspecific Virus from an African Bat. *J Virol*. 2014;88: 11297–  
661 11303. doi:10.1128/JVI.01498-14
- 662 51. Corman VM, Baldwin HJ, Tateno AF, Zerbinati RM, Annan A, Owusu M, et al. Evidence  
663 for an Ancestral Association of Human Coronavirus 229E with Bats. Schultz-Cherry S,  
664 editor. *J Virol*. 2015;89: 11858–11870. doi:10.1128/JVI.01755-15
- 665 52. Huynh J, Li S, Yount B, Smith A, Sturges L, Olsen JC, et al. Evidence Supporting a  
666 Zoonotic Origin of Human Coronavirus Strain NL63. *J Virol*. 2012;86: 12816–12825.  
667 doi:10.1128/jvi.00906-12
- 668 53. Drexler JF, Corman VM, Drosten C. Ecology, evolution and classification of bat  
669 coronaviruses in the aftermath of SARS. *Antiviral Res*. 2014;101: 45–56.  
670 doi:10.1016/j.antiviral.2013.10.013
- 671 54. Breed AC, Meers J, Sendow I, Bossart KN, Barr JA, Smith I, et al. The Distribution of  
672 Henipaviruses in Southeast Asia and Australasia: Is Wallace’s Line a Barrier to Nipah  
673 Virus? Schnell MJ, editor. *PLoS One*. 2013;8: e61316. doi:10.1371/journal.pone.0061316
- 674 55. Srilopan S, Bumrungsri S, Jantarit S. The Wrinkle-Lipped Free-Tailed Bat (*Chaerephon*  
675 *plicatus* Buchannan, 1800) Feeds Mainly on Brown Planthoppers in Rice Fields of Central  
676 Thailand. *Acta Chiropterologica*. 2018;20: 207. doi:10.3161/15081109ACC2018.20.1.016
- 677 56. Amman BR, Nyakarahuka L, McElroy AK, Dodd KA, Sealy TK, Schuh AJ, et al.  
678 Marburgvirus Resurgence in Kitaka Mine Bat Population after Extermination Attempts,  
679 Uganda. *Emerg Infect Dis*. 2014;20: 1761–1764. doi:10.3201/eid2010.140696
- 680 57. Francisco L, Sullivan A, Goley J, Martinez S. Living Safely with Bats. USAID; 2018.  
681 Available: <https://p2.predict.global/living-safely-with-bats-book>  
682

## Supporting information

**S1 Table. Summary of all testing results by genus, interface, sub-interface, sample types, sites, percentage of samples testing positive, and viral species.**

**S2 Table: Multivariate mixed effect logistic regression showing the association between season and interface with coronavirus positives in field rats in the rodent trade.**

**S3 Table: GenBank accession numbers for coronavirus sequences detected in this study and for reference sequences**

**S1 Data. Data required for all analysis and metadata for each parameter is available at (pending DOI processing): <https://doi.org/10.5061/dryad.7h44j0zrj> OR <https://datadryad.org/stash/share/pk3wVUxFNzTuCYZ9t8haKRPmx7V8YhTDBuHpG8JJ9kU>**

**S1 R Code. Code used to conduct the analysis described.**

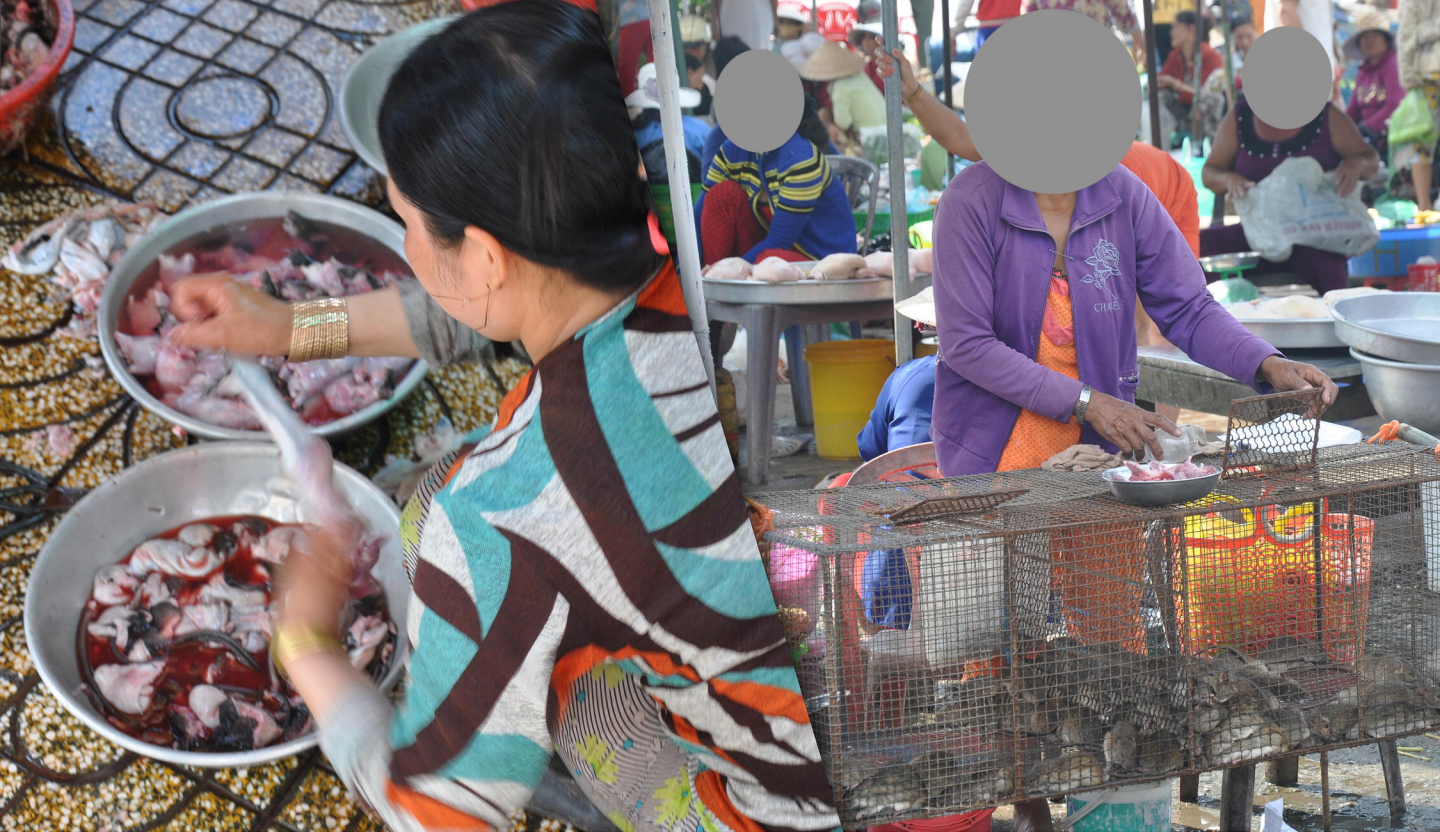

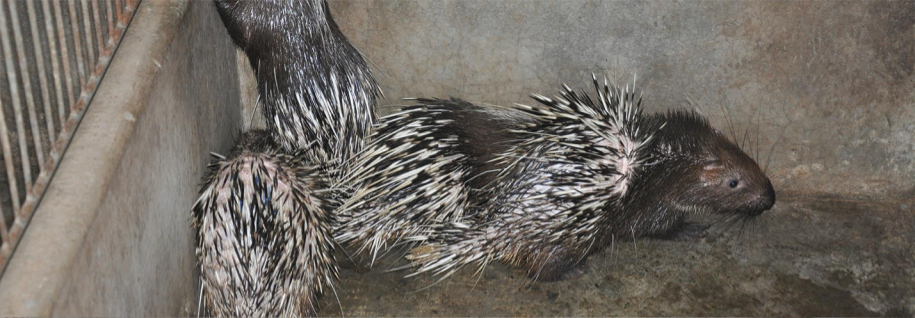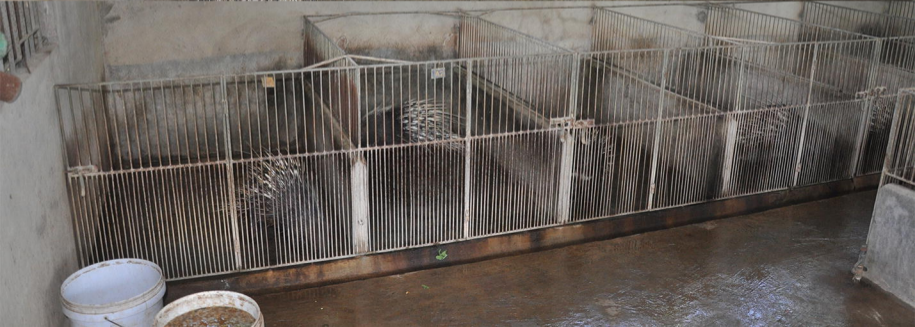

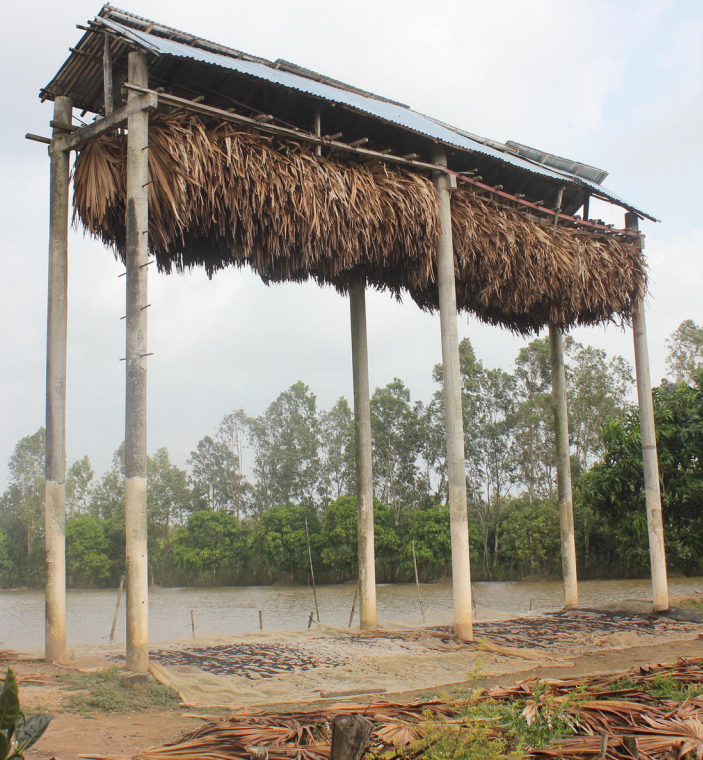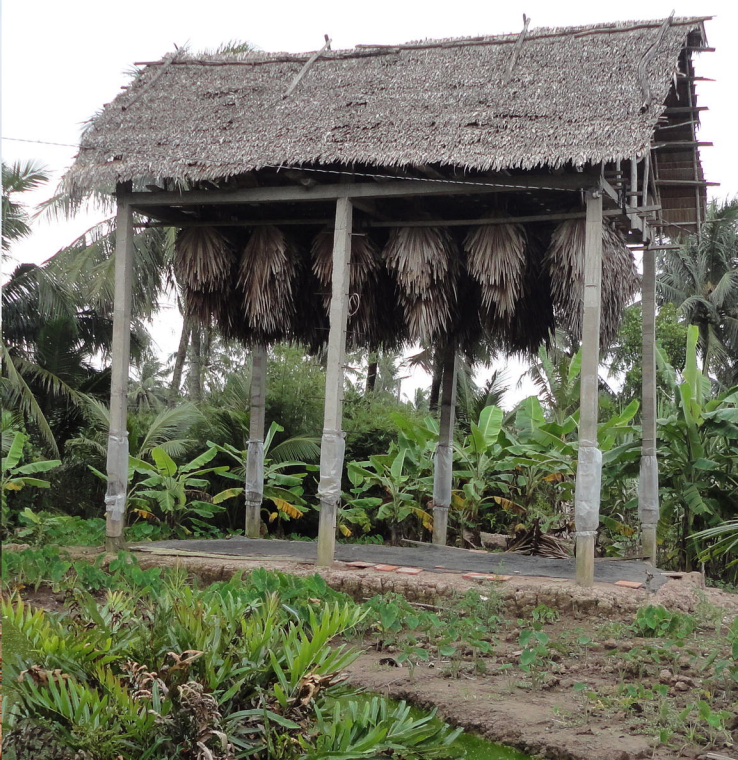



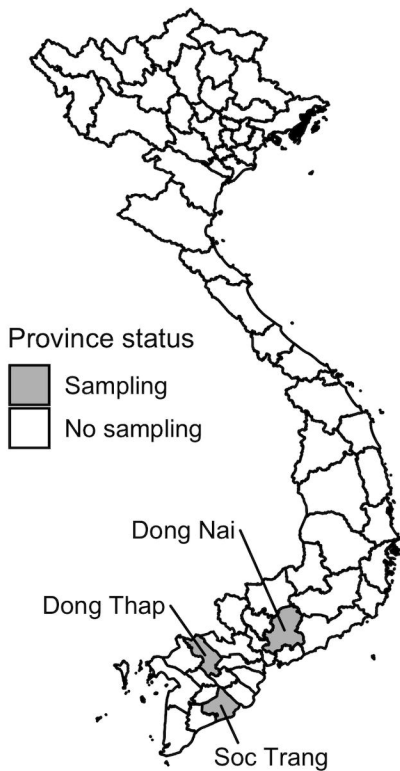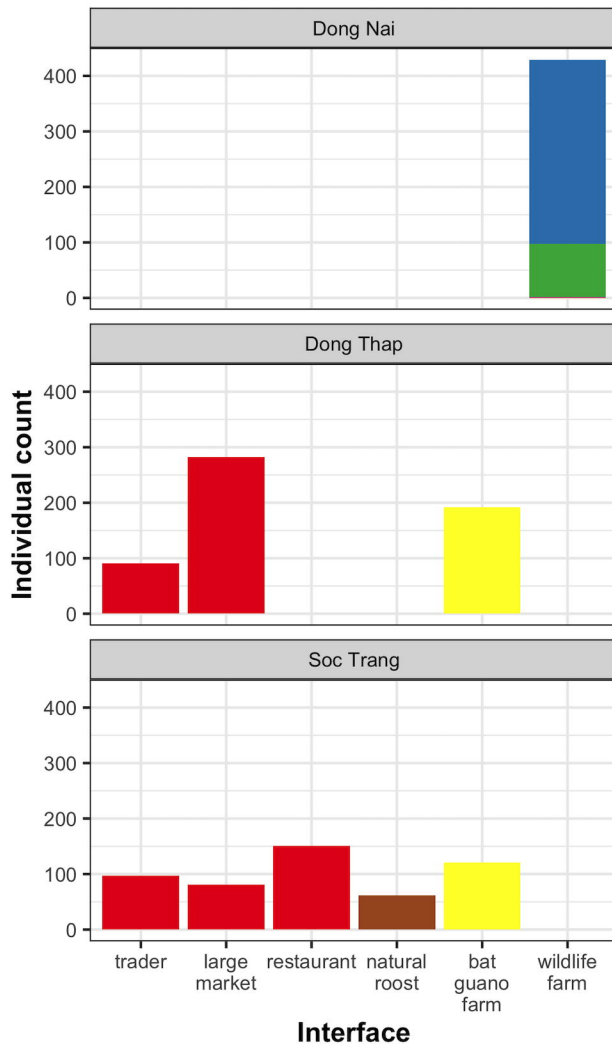

# Proportion of coronavirus-positive field rats

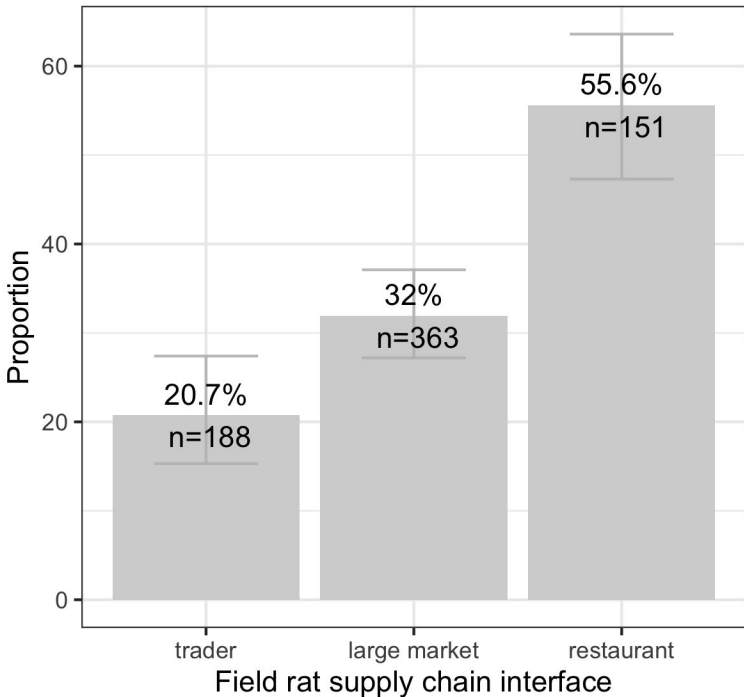

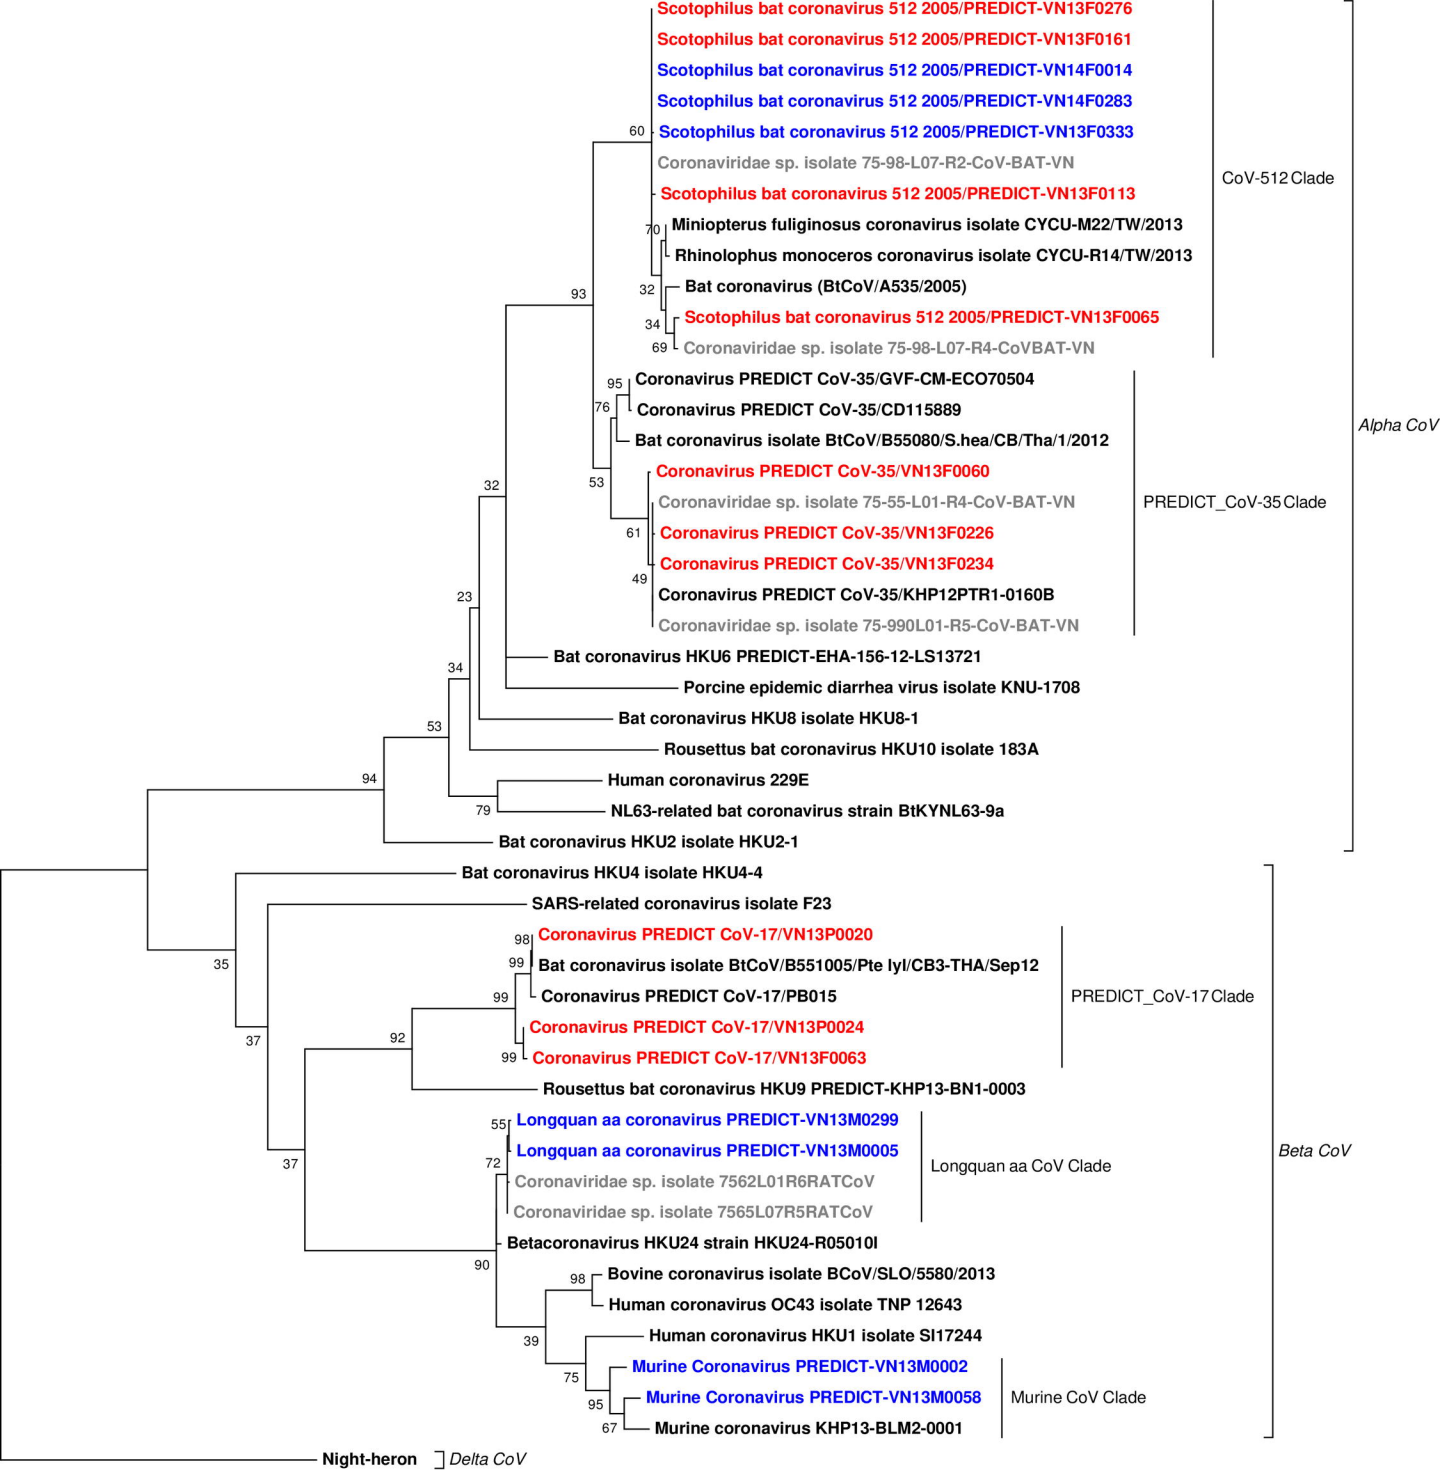

0.20

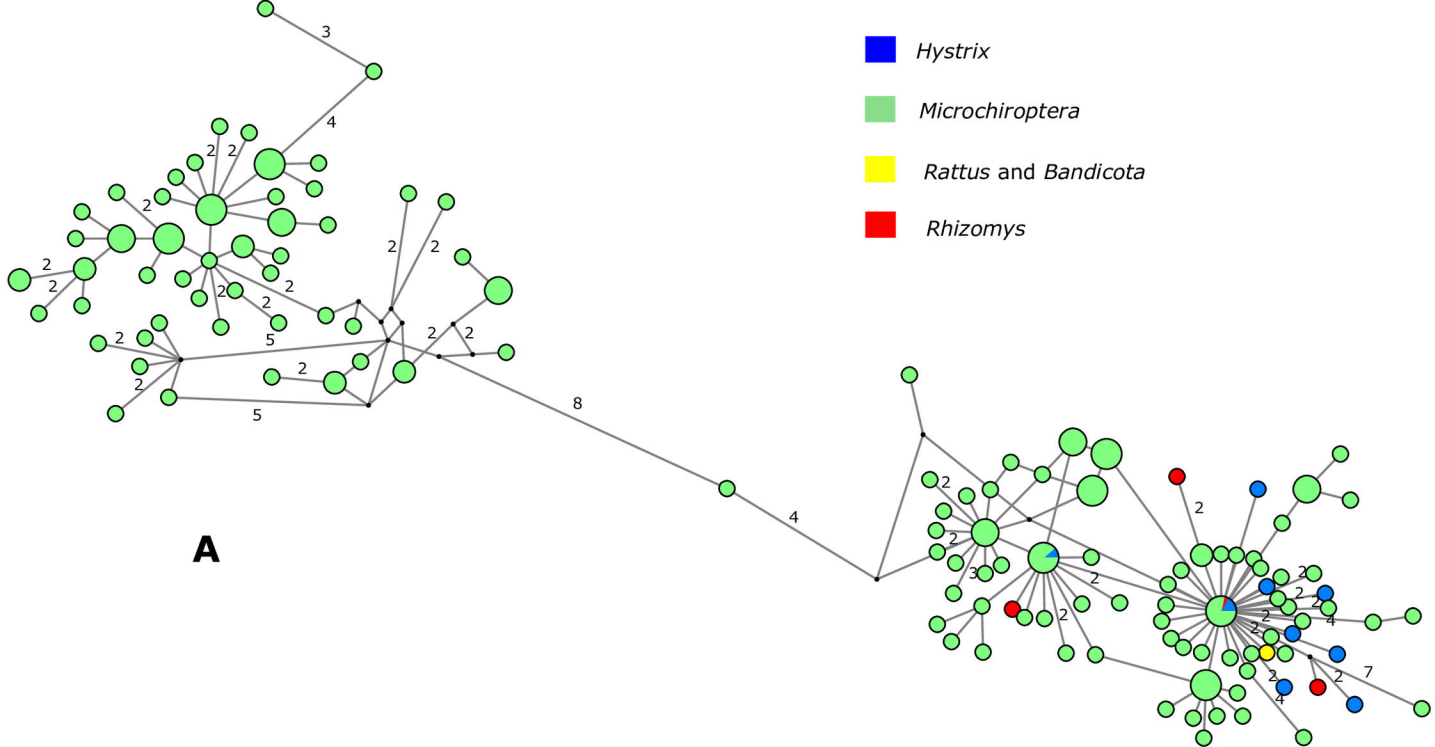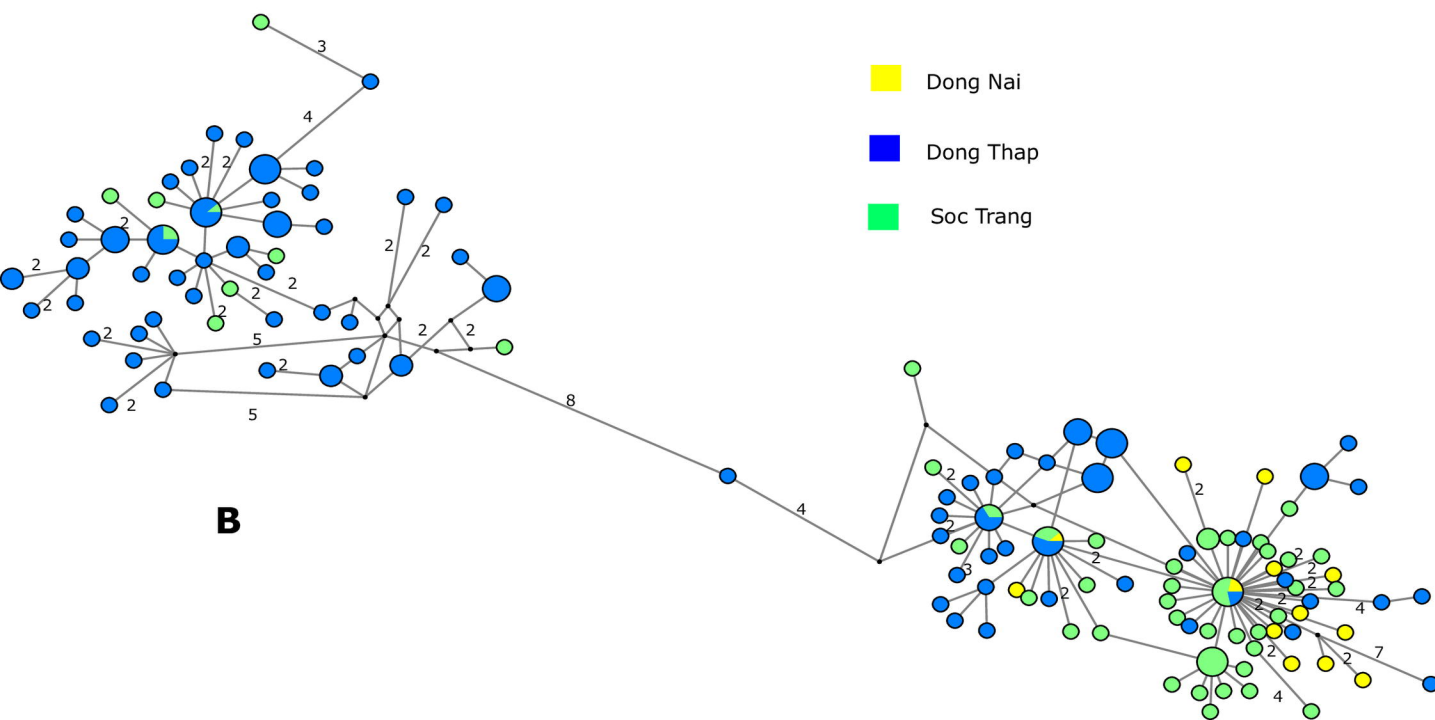

Source: https://www.biorxiv.org/content/biorxiv/early/2020/06/17/2020.06.05.098590.full.pdf
